# Supplementary material for: Using first principles calculations to identify new destabilized metal hydride reactions for reversible hydrogen storage
Source: Royal Society of Chemistry journal article supplement (doi:10.1039/b617927d), 2007-01-01
Supplement: b617927d.pdf [file b617927d.pdf]

**Supplementary Information for**  
**Using First Principles Calculations To Identify New Destabilized Metal Hydride**  
**Reactions for Reversible Hydrogen Storage**

Sudhakar V. Alapati<sup>1</sup>, J. Karl Johnson<sup>2,3</sup>, and David S. Sholl<sup>1,3\*</sup>  
<sup>1</sup>*Department. of Chemical Engineering, Carnegie Mellon University,*  
*Pittsburgh, PA 15213, USA*  
<sup>2</sup>*Department. of Chemical Engineering, University of Pittsburgh,*  
*Pittsburgh, PA 15261, USA*  
<sup>3</sup>*National Energy Technology Laboratory*  
*Pittsburgh, PA 15236*

**Table S1:** Enthalpy of reaction per mole of H<sub>2</sub> released for the reactions studied using the PW91 functional. \*\* indicates results for final materials with varying Si loading. For reactions involving LiBH<sub>4</sub>, the enthalpy for the reaction with the hexagonal and orthorhombic polymorphs of LiBH<sub>4</sub> is denoted by (h) and (o), respectively.

| No | Reaction                                                                                                      | wt.% H <sub>2</sub> | $\Delta U_0$<br>(PAW) |
|----|---------------------------------------------------------------------------------------------------------------|---------------------|-----------------------|
|    | <b>Calibration reactions and reactions for comparison with previous work</b>                                  |                     |                       |
| 1  | $\text{MgH}_2 \rightarrow \text{Mg} + \text{H}_2$                                                             | 7.67                | 65.1                  |
| 2  | $2 \text{LiH} \rightarrow 2 \text{Li} + \text{H}_2$                                                           | 12.70               | 171.4                 |
| 3  | $2 \text{MgH}_2 + \text{Si} \rightarrow \text{Mg}_2\text{Si} + 2 \text{H}_2$                                  | 5.00                | 37.9                  |
| 4  | $\text{MgH}_2 + 2 \text{LiBH}_4 \rightarrow 2 \text{LiH} + \text{MgB}_2 + 4 \text{H}_2$                       | 11.56               | 66.8 (o)<br>58.6 (h)  |
| 5  | $\text{CaH}_2 \rightarrow \text{Ca} + \text{H}_2$                                                             | 4.80                | 175.2                 |
| 6  | $2 \text{AlH}_3 \rightarrow 2 \text{Al} + 3 \text{H}_2$                                                       | 10.07               | 11.1                  |
| 7  | $\text{Ca}(\text{AlH}_4)_2 \rightarrow 2 \text{Al} + \text{Ca} + 4 \text{H}_2$                                | 7.91                | 54.3                  |
| 8  | $\text{Ca}(\text{AlH}_4)_2 \rightarrow 2 \text{Al} + \text{CaH}_2 + 3 \text{H}_2$                             | 5.93                | 14.0                  |
| 9  | $\text{LiBH}_4 \rightarrow \text{LiH} + \text{B} + 1.5 \text{H}_2$                                            | 13.91               | 82.4 (o)<br>71.5 (h)  |
| 10 | $\text{LiNH}_2 + 2 \text{LiH} \rightarrow \text{Li}_3\text{N} + 2 \text{H}_2$                                 | 10.39               | 109.4                 |
| 11 | $\text{LiBH}_4 + 2 \text{LiNH}_2 \rightarrow \text{Li}_3\text{BN}_2 + 4 \text{H}_2$                           | 11.93               | 24.3 (o)<br>20.2 (h)  |
|    | <b>Reaction with LiNH<sub>2</sub></b>                                                                         |                     |                       |
| 12 | **3 LiNH <sub>2</sub> + 2 LiH + Si → Li <sub>5</sub> N <sub>3</sub> Si + 4 H <sub>2</sub><br>(10/11 Si atoms) | 7.16                | 34.2/23.3             |
| 13 | $\text{LiNH}_2 + \text{MgH}_2 \rightarrow \text{LiMgN} + 2 \text{H}_2$                                        | 8.19                | 32.0                  |
| 14 | $2 \text{LiNH}_2 + 3 \text{MgH}_2 \rightarrow \text{Mg}_3\text{N}_2 + 2 \text{LiH} + 4 \text{H}_2$            | 6.47                | 6.9                   |

\* Corresponding author. Email: sholl@andrew.cmu.edu

|    |                                                                                                                     |       |                                      |
|----|---------------------------------------------------------------------------------------------------------------------|-------|--------------------------------------|
| 15 | $2 \text{LiNH}_2 + \text{MgH}_2 + \text{Si} \rightarrow \text{MgN}_2\text{Si} + 2 \text{LiH} + 2 \text{H}_2$        | 4.02  | -86.0                                |
| 16 | $\text{LiBH}_4 + 3 \text{MgH}_2 + 3 \text{LiNH}_2 \rightarrow \text{Mg}_3\text{BN}_3 + 4 \text{LiH} + 6 \text{H}_2$ | 7.14  | 5.8 (o)<br>3.1 (h)                   |
| 17 | $\text{N}(\text{SiH}_3)_3 + 3 \text{LiNH}_2 \rightarrow \text{N}_4\text{Si}_3 + 3 \text{LiH} + 6 \text{H}_2$        | 6.86  | -38.0                                |
|    | <b>Reaction with LiBH<sub>4</sub></b>                                                                               |       |                                      |
| 18 | $6 \text{LiBH}_4 + \text{Si} \rightarrow 6 \text{LiH} + \text{B}_6\text{Si} + 9 \text{H}_2$                         | 11.45 | 117.9 (o)<br>106.9 (h)               |
| 19 | $4 \text{LiBH}_4 + \text{MgH}_2 \rightarrow 4 \text{LiH} + \text{MgB}_4 + 7 \text{H}_2$                             | 12.46 | 69.2 (o)<br>59.9 (h)                 |
| 20 | $7 \text{LiBH}_4 + \text{MgH}_2 \rightarrow 7 \text{LiH} + \text{MgB}_7 + 11.5 \text{H}_2$                          | 12.99 | 71.5-75.5<br>(o)<br>61.5-65.5<br>(h) |
| 21 | $6 \text{LiBH}_4 + 7 \text{Si} \rightarrow 6 \text{LiSi} + \text{SiB}_6 + 12 \text{H}_2$                            | 7.39  | 109.9(o)<br>101.8(h)                 |
| 22 | $\text{MgH}_2 + 9 \text{LiBH}_4 + \text{LiNH}_2 \rightarrow \text{MgB}_9\text{N} + 10 \text{LiH} + 14 \text{H}_2$   | 11.5  | 108.4(o)<br>98.0(h)                  |
|    | <b>Reaction of MgH<sub>2</sub>, LiH and Si</b>                                                                      |       |                                      |
| 23 | $12 \text{LiH} + 3 \text{MgH}_2 + 4 \text{Si} \rightarrow \text{Li}_{12}\text{Mg}_3\text{Si}_4 + 9 \text{H}_2$      | 6.34  | 85.0                                 |
| 24 | $2 \text{NaMgH}_3 + 3 \text{Si} \rightarrow \text{Mg}_2\text{Si} + 2 \text{NaSi} + 3 \text{H}_2$                    | 3.27  | 57.5                                 |
| 25 | $4 \text{MgH}_2 + \text{Al} + 6 \text{Si} \rightarrow \text{AlMg}_4\text{Si}_6 + 4 \text{H}_2$                      | 2.68  | 92.4                                 |
| 26 | $4 \text{MgH}_2 + \text{AlH}_3 + 6 \text{Si} \rightarrow \text{AlMg}_4\text{Si}_6 + 5.5 \text{H}_2$                 | 3.65  | 70.2                                 |
| 27 | $2 \text{LiH} + 2 \text{Si} \rightarrow 2 \text{LiSi} + \text{H}_2$                                                 | 2.80  | 91.3                                 |
| 28 | $2 \text{LiH} + \text{Si} \rightarrow \text{Li}_2\text{Si} + \text{H}_2$                                            | 4.58  | 103.6                                |
| 29 | $7 \text{LiH} + 2 \text{Si} \rightarrow \text{Li}_7\text{Si}_2 + 1.5 \text{H}_2$                                    | 2.70  | 1139.9                               |
|    | <b>Reactions with CaH<sub>2</sub></b>                                                                               |       |                                      |
| 30 | $\text{CaH}_2 + 2 \text{Al} \rightarrow \text{Al}_2\text{Ca} + \text{H}_2$                                          | 2.10  | 73.8                                 |
| 31 | $3 \text{CaH}_2 + 2 \text{Al} + 2 \text{Si} \rightarrow \text{Al}_2\text{Ca}_3\text{Si}_2 + 3 \text{H}_2$           | 2.56  | 71.8                                 |
| 32 | $\text{CaH}_2 + 2 \text{Al} + 2 \text{Si} \rightarrow \text{Al}_2\text{CaSi}_2 + \text{H}_2$                        | 1.33  | 16.3                                 |
| 33 | $\text{CaH}_2 + \text{Si} \rightarrow \text{CaSi} + \text{H}_2$                                                     | 2.88  | 80.9                                 |
| 34 | $\text{CaH}_2 + 2 \text{Si} \rightarrow \text{CaSi}_2 + \text{H}_2$                                                 | 2.06  | 61.7                                 |
| 35 | $5 \text{CaH}_2 + 3 \text{Si} \rightarrow \text{Ca}_5\text{Si}_3 + 5 \text{H}_2$                                    | 3.43  | 100.9                                |
| 36 | $\text{CaH}_2 + \text{LiH} + 2 \text{Si} \rightarrow \text{CaLiSi}_2 + 1.5 \text{H}_2$                              | 2.85  | 65.0                                 |
| 37 | $2 \text{CaH}_2 + \text{LiH} + 3 \text{Si} \rightarrow \text{Ca}_2\text{LiSi}_3 + 2.5 \text{H}_2$                   | 2.86  | 64.6                                 |
| 38 | $\text{CaH}_2 + 2 \text{LiH} \rightarrow \text{CaLi}_2 + 2 \text{H}_2$                                              | 6.96  | 78.3                                 |
| 39 | $\text{CaH}_2 + 6 \text{LiBH}_4 \rightarrow \text{CaB}_6 + 6 \text{LiH} + 10 \text{H}_2$                            | 11.69 | 62.7 (o)<br>52.9 (h)                 |
| 40 | $\text{CaH}_2 + \text{MgH}_2 + \text{Si} \rightarrow \text{CaMgSi} + 2 \text{H}_2$                                  | 4.19  | 51.8                                 |
| 41 | $3 \text{CaH}_2 + \text{LiBH}_4 + 3 \text{LiNH}_2 \rightarrow \text{Ca}_3\text{BN}_3 + 4 \text{LiH} + 6 \text{H}_2$ | 5.58  | 38.8 (o)<br>36.1 (h)                 |
| 42 | $\text{CaH}_2 + 2 \text{MgH}_2 \rightarrow \text{CaMg}_2 + 3 \text{H}_2$                                            | 6.38  | 88.3                                 |
| 43 | $\text{CaH}_2 + \text{LiNH}_2 \rightarrow \text{CaLiN} + 2 \text{H}_2$                                              | 6.20  | 88.1                                 |
| 44 | $2 \text{CaH}_2 + \text{LiNH}_2 \rightarrow \text{Ca}_2\text{HN} + \text{LiH} + 2 \text{H}_2$                       | 3.76  | 74.7                                 |
| 45 | $3 \text{CaH}_2 + 3 \text{LiNH}_2 + \text{Al} \rightarrow \text{Ca}_3\text{AlN}_3 + 3 \text{LiH} + 4.5 \text{H}_2$  | 4.08  | 34.8                                 |
| 46 | $3 \text{CaH}_2 + 3 \text{LiNH}_2 + \text{AlH}_3 \rightarrow \text{Ca}_3\text{AlN}_3 + 3 \text{LiH} + 6 \text{H}_2$ | 5.37  | 28.9                                 |

|    |                                                                                                                                                     |       |                      |
|----|-----------------------------------------------------------------------------------------------------------------------------------------------------|-------|----------------------|
| 47 | $\text{CaH}_2 + 2 \text{MgH}_2 + 2 \text{LiNH}_2 \rightarrow \text{CaMg}_2\text{N}_2 + 2 \text{LiH} + 4 \text{H}_2$                                 | 5.73  | 29.2                 |
|    | <b>Reaction of <math>\text{Ca}(\text{AlH}_4)_2</math> and Si</b>                                                                                    |       |                      |
| 48 | $\text{Ca}(\text{AlH}_4)_2 + \text{Si} \rightarrow 2 \text{Al} + \text{CaSi} + 4 \text{H}_2$                                                        | 6.30  | 30.7                 |
| 49 | $\text{Ca}(\text{AlH}_4)_2 + 2 \text{Si} \rightarrow \text{Al}_2\text{CaSi}_2 + 4 \text{H}_2$                                                       | 5.10  | 14.5                 |
| 50 | $3 \text{Ca}(\text{AlH}_4)_2 + 2 \text{Si} \rightarrow 2 \text{Al}_2\text{Ca} + \text{Al}_2\text{CaSi}_2 + 12 \text{H}_2$                           | 6.69  | 24.1                 |
| 51 | $3 \text{Ca}(\text{AlH}_4)_2 + 2 \text{Si} \rightarrow 4 \text{Al} + \text{Al}_2\text{Ca}_3\text{Si}_2 + 12 \text{H}_2$                             | 6.69  | 28.4                 |
| 52 | $3 \text{Ca}(\text{AlH}_4)_2 + 2 \text{Si} \rightarrow 4 \text{AlH}_3 + \text{Al}_2\text{Ca}_3\text{Si}_2 + 6 \text{H}_2$                           | 3.34  | 45.4                 |
|    | <b>Reaction of <math>\text{Ca}(\text{AlH}_4)_2</math> and <math>\text{MgH}_2</math></b>                                                             |       |                      |
| 53 | $6 \text{Ca}(\text{AlH}_4)_2 + 17 \text{MgH}_2 \rightarrow \text{Al}_{12}\text{Mg}_{17} + 6 \text{CaH}_2 + 35 \text{H}_2$                           | 6.67  | 35.5                 |
| 54 | $\text{Ca}(\text{AlH}_4)_2 + 2 \text{MgH}_2 \rightarrow \text{CaMg}_2 + 2 \text{Al} + 6 \text{H}_2$                                                 | 7.83  | 51.6                 |
| 55 | $\text{Ca}(\text{AlH}_4)_2 + 2 \text{MgH}_2 \rightarrow \text{CaMg}_2 + 2 \text{AlH}_3 + 3 \text{H}_2$                                              | 3.92  | 91.7                 |
|    | <b>Reaction of <math>\text{Ca}(\text{AlH}_4)_2</math> and LiH</b>                                                                                   |       |                      |
| 56 | $\text{Ca}(\text{AlH}_4)_2 + 2 \text{LiH} \rightarrow 2 \text{AlLi} + \text{CaH}_2 + 4 \text{H}_2$                                                  | 6.85  | 33.3                 |
| 57 | $2 \text{Ca}(\text{AlH}_4)_2 + 6 \text{LiH} \rightarrow 2 \text{Al}_2\text{Li}_3 + 2 \text{CaH}_2 + 9 \text{H}_2$                                   | 7.22  | 43.9                 |
| 58 | $2 \text{Ca}(\text{AlH}_4)_2 + 9 \text{LiH} \rightarrow \text{Al}_4\text{Li}_9 + 2 \text{CaH}_2 + 10.5 \text{H}_2$                                  | 7.69  | 60.5                 |
| 59 | $3 \text{Ca}(\text{AlH}_4)_2 + 2 \text{LiH} \rightarrow 2 \text{Al}_3\text{Li} + 3 \text{CaH}_2 + 10 \text{H}_2$                                    | 6.27  | 20.5                 |
| 60 | $3 \text{Ca}(\text{AlH}_4)_2 + 4 \text{LiH} \rightarrow 4 \text{AlLi} + \text{Al}_2\text{Ca} + 2 \text{CaH}_2 + 12 \text{H}_2$                      | 7.17  | 31.8                 |
| 61 | $3 \text{Ca}(\text{AlH}_4)_2 + 8 \text{LiH} \rightarrow 2 \text{Al}_3\text{Li} + 3 \text{CaLi}_2 + 16 \text{H}_2$                                   | 8.74  | 76.9                 |
| 62 | $4 \text{Ca}(\text{AlH}_4)_2 + 26 \text{LiH} \rightarrow 2 \text{Al}_4\text{Li}_9 + 4 \text{CaLi}_2 + 29 \text{H}_2$                                | 9.65  | 91.0                 |
|    | <b>Reaction of <math>\text{Ca}(\text{AlH}_4)_2</math>, LiH and Si</b>                                                                               |       |                      |
| 63 | $\text{Ca}(\text{AlH}_4)_2 + 2 \text{LiH} + 2 \text{Si} \rightarrow 2 \text{AlLiSi} + \text{CaH}_2 + 4 \text{H}_2$                                  | 4.64  | 17.6                 |
| 64 | $\text{Ca}(\text{AlH}_4)_2 + \text{LiH} + 2 \text{Si} \rightarrow 2 \text{Al} + \text{CaLiSi}_2 + 4.5 \text{H}_2$                                   | 5.47  | 31.0                 |
| 65 | $\text{Ca}(\text{AlH}_4)_2 + \text{LiH} + 2 \text{Si} \rightarrow 2 \text{AlH}_3 + \text{CaLiSi}_2 + 1.5 \text{H}_2$                                | 1.82  | 70.2                 |
| 66 | $2 \text{Ca}(\text{AlH}_4)_2 + \text{LiH} + 3 \text{Si} \rightarrow 4 \text{Al} + \text{Ca}_2\text{LiSi}_3 + 8.5 \text{H}_2$                        | 5.79  | 28.8                 |
| 67 | $2 \text{Ca}(\text{AlH}_4)_2 + \text{LiH} + 3 \text{Si} \rightarrow 4 \text{AlH}_3 + \text{Ca}_2\text{LiSi}_3 + 2.5 \text{H}_2$                     | 1.70  | 70.7                 |
|    | <b>Reaction of <math>\text{Ca}(\text{AlH}_4)_2</math> and <math>\text{LiBH}_4</math></b>                                                            |       |                      |
| 68 | $2 \text{Ca}(\text{AlH}_4)_2 + 4 \text{LiBH}_4 \rightarrow 2 \text{AlB}_2 + 2 \text{AlH}_3 + 2 \text{CaLi}_2 + 13 \text{H}_2$                       | 9.14  | 92.0 (o)<br>86.9 (h) |
| 69 | $4 \text{Ca}(\text{AlH}_4)_2 + 4 \text{LiBH}_4 \rightarrow 2 \text{Al}_3\text{Li} + 2 \text{AlB}_2 + 2 \text{LiH} + 2 \text{CaH}_2 + 21 \text{H}_2$ | 8.56  | 67.9 (o)<br>64.7 (h) |
| 70 | $2 \text{Ca}(\text{AlH}_4)_2 + 6 \text{LiBH}_4 \rightarrow \text{CaB}_6 + 2 \text{Al}_2\text{Li}_3 + \text{CaH}_2 + 19 \text{H}_2$                  | 10.85 | 53.4 (o)<br>48.3 (h) |
|    | <b>Reaction of <math>\text{Ca}(\text{AlH}_4)_2</math> and <math>\text{LiNH}_2</math></b>                                                            |       |                      |
| 71 | $\text{Ca}(\text{AlH}_4)_2 + \text{LiNH}_2 \rightarrow \text{CaH}_2 + \text{AlLi} + \text{AlN} + 4 \text{H}_2$                                      | 6.46  | -20.5                |
| 72 | $\text{Ca}(\text{AlH}_4)_2 + 2 \text{LiNH}_2 \rightarrow \text{CaH}_2 + 2 \text{LiH} + 2 \text{AlN} + 4 \text{H}_2$                                 | 5.46  | -73.3                |
| 73 | $\text{Ca}(\text{AlH}_4)_2 + 2 \text{LiNH}_2 \rightarrow \text{CaLi}_2 + 2 \text{AlN} + 6 \text{H}_2$                                               | 8.19  | 7.4                  |
| 74 | $\text{Ca}(\text{AlH}_4)_2 + 3 \text{LiNH}_2 \rightarrow \text{CaH}_2 + \text{AlLi}_3\text{N}_2 + \text{AlN} + 6 \text{H}_2$                        | 7.09  | -26.4                |

|    |                                                                                                                                                   |      |       |
|----|---------------------------------------------------------------------------------------------------------------------------------------------------|------|-------|
| 75 | $\text{Ca}(\text{AlH}_4)_2 + 3 \text{LiNH}_2 \rightarrow \text{CaH}_2 + 2 \text{AlN} + \text{Li}_3\text{N} + 6 \text{H}_2$                        | 7.09 | -12.4 |
| 76 | $\text{Ca}(\text{AlH}_4)_2 + 3 \text{LiNH}_2 \rightarrow \text{CaH}_2 + 2 \text{AlLi} + \text{LiN}_3 + 6 \text{H}_2$                              | 7.09 | 86.0  |
| 77 | $\text{Ca}(\text{AlH}_4)_2 + 3 \text{LiNH}_2 \rightarrow \text{CaLi}_2 + \text{LiN}_3 + 2 \text{Al} + 7 \text{H}_2$                               | 8.27 | 109.1 |
| 78 | $\text{Ca}(\text{AlH}_4)_2 + 3 \text{LiNH}_2 \rightarrow \text{CaLi}_2 + \text{LiN}_3 + 2 \text{AlH}_3 + 4 \text{H}_2$                            | 4.72 | 182.7 |
| 79 | $\text{Ca}(\text{AlH}_4)_2 + 4 \text{LiNH}_2 \rightarrow \text{CaH}_2 + \text{AlN} + \text{AlLi} + \text{LiN}_3 + 2 \text{LiH} + 6 \text{H}_2$    | 6.25 | 40.9  |
| 80 | $\text{Ca}(\text{AlH}_4)_2 + 4 \text{LiNH}_2 \rightarrow \text{CaLi}_2 + \text{AlN} + \text{AlLi} + \text{LiN}_3 + 8 \text{H}_2$                  | 8.33 | 80.3  |
| 81 | $\text{Ca}(\text{AlH}_4)_2 + 5 \text{LiNH}_2 \rightarrow \text{CaH}_2 + 4 \text{LiH} + 2 \text{AlN} + \text{LiN}_3 + 6 \text{H}_2$                | 5.33 | 15.6  |
| 82 | $\text{Ca}(\text{AlH}_4)_2 + 5 \text{LiNH}_2 \rightarrow \text{CaH}_2 + \text{AlLi}_3\text{N}_2 + \text{LiN}_3 + \text{AlLi} + 8 \text{H}_2$      | 7.45 | 55.0  |
| 83 | $\text{Ca}(\text{AlH}_4)_2 + 5 \text{LiNH}_2 \rightarrow \text{CaLi}_2 + 2 \text{LiH} + 2 \text{AlN} + \text{LiN}_3 + 8 \text{H}_2$               | 7.45 | 54.0  |
| 84 | $\text{Ca}(\text{AlH}_4)_2 + 6 \text{LiNH}_2 \rightarrow \text{CaH}_2 + 2 \text{LiN}_3 + 2 \text{AlLi} + 2 \text{LiH} + 8 \text{H}_2$             | 8.38 | 27.6  |
| 85 | $\text{Ca}(\text{AlH}_4)_2 + 6 \text{LiNH}_2 \rightarrow \text{CaLi}_2 + 2 \text{LiN}_3 + 2 \text{AlLi} + 10 \text{H}_2$                          | 9.31 | 124.1 |
| 86 | $2 \text{Ca}(\text{AlH}_4)_2 + \text{LiNH}_2 \rightarrow 2 \text{CaH}_2 + \text{AlN} + \text{Al}_3\text{Li} + 7 \text{H}_2$                       | 6.22 | -7.0  |
| 87 | $2 \text{Ca}(\text{AlH}_4)_2 + \text{LiNH}_2 \rightarrow \text{Ca}_2\text{N} + \text{AlLi} + 3 \text{Al} + 9 \text{H}_2$                          | 8.00 | 41.7  |
| 88 | $2 \text{Ca}(\text{AlH}_4)_2 + \text{LiNH}_2 \rightarrow \text{Ca}_2\text{N} + \text{Al}_3\text{Li} + \text{AlH}_3 + 7.5 \text{H}_2$              | 6.67 | 47.0  |
| 89 | $2 \text{Ca}(\text{AlH}_4)_2 + \text{LiNH}_2 \rightarrow \text{Ca}_2\text{N} + \text{AlLi} + 3 \text{AlH}_3 + 4.5 \text{H}_2$                     | 4.00 | 72.2  |
| 90 | $2 \text{Ca}(\text{AlH}_4)_2 + \text{LiNH}_2 \rightarrow \text{Ca}_2\text{N} + \text{Al}_3\text{Li} + \text{Al} + 9 \text{H}_2$                   | 8.00 | 112.9 |
| 91 | $2 \text{Ca}(\text{AlH}_4)_2 + 2 \text{LiNH}_2 \rightarrow 2 \text{CaH}_2 + 2 \text{AlN} + 2 \text{LiH} + 2 \text{AlH}_3 + 4 \text{H}_2$          | 3.23 | -71.9 |
| 92 | $2 \text{Ca}(\text{AlH}_4)_2 + 2 \text{LiNH}_2 \rightarrow 2 \text{CaH}_2 + 2 \text{AlN} + 2 \text{LiH} + 2 \text{Al} + 7 \text{H}_2$             | 5.65 | -36.3 |
| 93 | $2 \text{Ca}(\text{AlH}_4)_2 + 2 \text{LiNH}_2 \rightarrow \text{CaLi}_2 + \text{CaH}_2 + 2 \text{AlN} + 2 \text{Al} + 9 \text{H}_2$              | 7.27 | 9.3   |
| 94 | $2 \text{Ca}(\text{AlH}_4)_2 + 2 \text{LiNH}_2 \rightarrow \text{CaLi}_2 + \text{CaH}_2 + 2 \text{AlN} + 2 \text{AlH}_3 + 6 \text{H}_2$           | 4.84 | 8.4   |
| 95 | $2 \text{Ca}(\text{AlH}_4)_2 + 2 \text{LiNH}_2 \rightarrow \text{Ca}_2\text{N} + \text{AlN} + 3 \text{Al} + 2 \text{LiH} + 9 \text{H}_2$          | 7.27 | 18.2  |
| 96 | $2 \text{Ca}(\text{AlH}_4)_2 + 2 \text{LiNH}_2 \rightarrow \text{Ca}_2\text{N} + \text{Al}_3\text{Li} + \text{AlN} + \text{LiH} + 9.5 \text{H}_2$ | 7.67 | 21.4  |
| 97 | $2 \text{Ca}(\text{AlH}_4)_2 + 2 \text{LiNH}_2 \rightarrow \text{Ca}_2\text{N} + \text{AlN} + 3 \text{AlH}_3 + 2 \text{LiH} + 4.5 \text{H}_2$     | 3.63 | 25.3  |
| 98 | $2 \text{Ca}(\text{AlH}_4)_2 + 3 \text{LiNH}_2 \rightarrow 2 \text{CaH}_2 + 3 \text{AlN} + 3 \text{LiH} + \text{AlH}_3 + 6 \text{H}_2$            | 4.44 | -72.8 |
| 99 | $2 \text{Ca}(\text{AlH}_4)_2 + 3 \text{LiNH}_2 \rightarrow 2 \text{CaH}_2 + 3 \text{AlN} + 3 \text{LiH} +$                                        | 5.54 | -56.1 |

|     |                                                                                                                                                                       |      |       |
|-----|-----------------------------------------------------------------------------------------------------------------------------------------------------------------------|------|-------|
|     | $\text{Al} + 7.5 \text{H}_2$                                                                                                                                          |      |       |
| 100 | $2 \text{Ca}(\text{AlH}_4)_2 + 3 \text{LiNH}_2 \rightarrow 2 \text{CaH}_2 + \text{Li}_3\text{N} + 2 \text{AlN} + 2 \text{AlH}_3 + 6 \text{H}_2$                       | 4.44 | -11.4 |
| 101 | $2 \text{Ca}(\text{AlH}_4)_2 + 3 \text{LiNH}_2 \rightarrow 2 \text{CaH}_2 + \text{Li}_3\text{N} + 2 \text{AlN} + 2 \text{Al} + 9 \text{H}_2$                          | 6.65 | -3.9  |
| 102 | $2 \text{Ca}(\text{AlH}_4)_2 + 3 \text{LiNH}_2 \rightarrow \text{CaH}_2 + \text{CaLi}_2 + \text{AlLi} + 3 \text{AlN} + 10 \text{H}_2$                                 | 7.39 | -3.8  |
| 103 | $2 \text{Ca}(\text{AlH}_4)_2 + 3 \text{LiNH}_2 \rightarrow \text{Ca}_2\text{N} + 2 \text{AlN} + 2 \text{AlLi} + \text{LiH} + 10.5 \text{H}_2$                         | 7.76 | 8.4   |
| 104 | $2 \text{Ca}(\text{AlH}_4)_2 + 3 \text{LiNH}_2 \rightarrow \text{Ca}_2\text{N} + \text{Al}_2\text{Li}_3 + 2 \text{AlN} + 11 \text{H}_2$                               | 8.13 | 13.7  |
| 105 | $2 \text{Ca}(\text{AlH}_4)_2 + 3 \text{LiNH}_2 \rightarrow \text{Ca}_2\text{N} + \text{Li}_3\text{N} + \text{AlN} + 3 \text{Al} + 11 \text{H}_2$                      | 8.13 | 34.8  |
| 106 | $2 \text{Ca}(\text{AlH}_4)_2 + 3 \text{LiNH}_2 \rightarrow \text{Ca}_2\text{N} + \text{Li}_3\text{N} + \text{AlN} + 3 \text{AlH}_3 + 6.5 \text{H}_2$                  | 4.81 | 51.2  |
| 107 | $2 \text{Ca}(\text{AlH}_4)_2 + 3 \text{LiNH}_2 \rightarrow 2 \text{CaH}_2 + \text{LiN}_3 + 2 \text{AlLi} + 2 \text{Al} + 9 \text{H}_2$                                | 6.65 | 61.7  |
| 108 | $2 \text{Ca}(\text{AlH}_4)_2 + 3 \text{LiNH}_2 \rightarrow \text{CaLi}_2 + \text{Al}_2\text{Ca} + \text{LiN}_3 + 2 \text{Al} + 11 \text{H}_2$                         | 8.13 | 79.6  |
| 109 | $2 \text{Ca}(\text{AlH}_4)_2 + 3 \text{LiNH}_2 \rightarrow \text{CaH}_2 + \text{CaLi}_2 + \text{LiN}_3 + 4 \text{Al} + 10 \text{H}_2$                                 | 7.39 | 80.3  |
| 110 | $2 \text{Ca}(\text{AlH}_4)_2 + 3 \text{LiNH}_2 \rightarrow 2 \text{CaH}_2 + \text{LiN}_3 + 2 \text{AlLi} + 2 \text{AlH}_3 + 6 \text{H}_2$                             | 4.44 | 87.0  |
| 111 | $2 \text{Ca}(\text{AlH}_4)_2 + 3 \text{LiNH}_2 \rightarrow \text{CaLi}_2 + \text{Al}_2\text{Ca} + \text{LiN}_3 + 2 \text{AlH}_3 + 8 \text{H}_2$                       | 5.92 | 105.2 |
| 112 | $2 \text{Ca}(\text{AlH}_4)_2 + 3 \text{LiNH}_2 \rightarrow \text{CaH}_2 + \text{CaLi}_2 + \text{LiN}_3 + 4 \text{AlH}_3 + 4 \text{H}_2$                               | 2.96 | 184.1 |
| 113 | $2 \text{Ca}(\text{AlH}_4)_2 + 4 \text{LiNH}_2 \rightarrow 2 \text{CaH}_2 + \text{Li}_3\text{N} + 3 \text{AlN} + \text{AlLi} + 10 \text{H}_2$                         | 6.82 | -15.6 |
| 114 | $2 \text{Ca}(\text{AlH}_4)_2 + 4 \text{LiNH}_2 \rightarrow \text{Ca}_2\text{N} + \text{AlLi}_3\text{N}_2 + \text{AlLi} + \text{AlN} + \text{Al} + 12 \text{H}_2$      | 8.19 | 14.8  |
| 115 | $2 \text{Ca}(\text{AlH}_4)_2 + 4 \text{LiNH}_2 \rightarrow \text{Ca}_2\text{N} + \text{AlLi}_3\text{N}_2 + \text{AlLi} + \text{AlN} + \text{AlH}_3 + 10.5 \text{H}_2$ | 7.16 | 15.3  |
| 116 | $2 \text{Ca}(\text{AlH}_4)_2 + 4 \text{LiNH}_2 \rightarrow \text{Ca}_2\text{N} + \text{Li}_3\text{N} + 2 \text{AlN} + \text{AlLi} + \text{Al} + 12 \text{H}_2$        | 8.19 | 21.8  |
| 117 | $2 \text{Ca}(\text{AlH}_4)_2 + 4 \text{LiNH}_2 \rightarrow \text{Ca}_2\text{N} + \text{Li}_3\text{N} + 2 \text{AlN} + \text{AlLi} + \text{AlH}_3 + 10.5 \text{H}_2$   | 7.16 | 23.3  |
| 118 | $2 \text{Ca}(\text{AlH}_4)_2 + 4 \text{LiNH}_2 \rightarrow 2 \text{CaH}_2 + \text{LiN}_3 + 3 \text{AlLi} + \text{AlN} + 10 \text{H}_2$                                | 6.82 | 43.4  |
| 119 | $2 \text{Ca}(\text{AlH}_4)_2 + 4 \text{LiNH}_2 \rightarrow 2 \text{CaH}_2 + \text{Al}_2\text{Li}_3 + \text{LiN}_3 + \text{AlN} + \text{Al} + 10 \text{H}_2$           | 6.82 | 45.2  |
| 120 | $2 \text{Ca}(\text{AlH}_4)_2 + 4 \text{LiNH}_2 \rightarrow 2 \text{CaH}_2 + \text{Al}_2\text{Li}_3 + \text{LiN}_3 + \text{AlN} + \text{AlH}_3 + 8.5 \text{H}_2$       | 5.80 | 51.3  |
| 121 | $2 \text{Ca}(\text{AlH}_4)_2 + 4 \text{LiNH}_2 \rightarrow \text{Ca}_2\text{N} + \text{LiN}_3 + 3 \text{AlLi} + \text{Al} + 12 \text{H}_2$                            | 8.19 | 71.0  |
| 122 | $2 \text{Ca}(\text{AlH}_4)_2 + 4 \text{LiNH}_2 \rightarrow \text{Ca}_2\text{N} + \text{LiN}_3 + 3 \text{AlLi} +$                                                      | 7.16 | 79.6  |

|     |                                                                                                                                                                     |      |       |
|-----|---------------------------------------------------------------------------------------------------------------------------------------------------------------------|------|-------|
|     | $\text{AlH}_3 + 10.5 \text{H}_2$                                                                                                                                    |      |       |
| 123 | $2 \text{Ca}(\text{AlH}_4)_2 + 5 \text{LiNH}_2 \rightarrow 2 \text{CaH}_2 + \text{Li}_3\text{N} + 2 \text{LiH} + 4 \text{AlN} + 10 \text{H}_2$                      | 6.33 | -36.8 |
| 124 | $2 \text{Ca}(\text{AlH}_4)_2 + 5 \text{LiNH}_2 \rightarrow \text{Ca}_2\text{N} + 4 \text{AlN} + 5 \text{LiH} + 10.5 \text{H}_2$                                     | 6.65 | -31.9 |
| 125 | $2 \text{Ca}(\text{AlH}_4)_2 + 5 \text{LiNH}_2 \rightarrow 2 \text{CaH}_2 + \text{LiN}_3 + 2 \text{AlN} + 2 \text{AlLi} + 2 \text{LiH} + 10 \text{H}_2$             | 6.33 | 22.3  |
| 126 | $2 \text{Ca}(\text{AlH}_4)_2 + 5 \text{LiNH}_2 \rightarrow \text{Ca}_2\text{N} + \text{LiN}_3 + \text{Al}_3\text{Li} + \text{AlN} + 3 \text{LiH} + 11.5 \text{H}_2$ | 7.28 | 51.3  |
| 127 | $2 \text{Ca}(\text{AlH}_4)_2 + 5 \text{LiNH}_2 \rightarrow \text{Ca}_2\text{N} + \text{LiN}_3 + 3 \text{AlLi} + \text{AlN} + \text{LiH} + 12.5 \text{H}_2$          | 7.91 | 54.9  |
| 128 | $2 \text{Ca}(\text{AlH}_4)_2 + 5 \text{LiNH}_2 \rightarrow 2 \text{CaLi}_2 + \text{LiN}_3 + 2 \text{AlN} + 2 \text{Al} + 13 \text{H}_2$                             | 8.23 | 62.2  |
| 129 | $2 \text{Ca}(\text{AlH}_4)_2 + 5 \text{LiNH}_2 \rightarrow 2 \text{CaLi}_2 + \text{LiN}_3 + 2 \text{AlN} + 2 \text{AlH}_3 + 10 \text{H}_2$                          | 6.33 | 77.5  |
| 130 | $3 \text{Ca}(\text{AlH}_4)_2 + \text{LiNH}_2 \rightarrow 3 \text{CaH}_2 + \text{Al}_3\text{Li} + \text{AlN} + 2 \text{AlH}_3 + 7 \text{H}_2$                        | 4.29 | -6.1  |
| 131 | $3 \text{Ca}(\text{AlH}_4)_2 + \text{LiNH}_2 \rightarrow 3 \text{CaH}_2 + \text{Al}_3\text{Li} + \text{AlN} + 2 \text{Al} + 10 \text{H}_2$                          | 6.13 | -1.0  |
| 132 | $3 \text{Ca}(\text{AlH}_4)_2 + \text{LiNH}_2 \rightarrow \text{Ca}_2\text{N} + \text{CaH}_2 + \text{Al}_3\text{Li} + 3 \text{Al} + 12 \text{H}_2$                   | 7.36 | 34.0  |
| 133 | $3 \text{Ca}(\text{AlH}_4)_2 + \text{LiNH}_2 \rightarrow \text{Ca}_2\text{N} + \text{CaH}_2 + \text{AlLi} + 5 \text{Al} + 12 \text{H}_2$                            | 7.36 | 34.5  |
| 134 | $3 \text{Ca}(\text{AlH}_4)_2 + \text{LiNH}_2 \rightarrow \text{Ca}_2\text{N} + \text{Al}_2\text{Ca} + \text{Al}_3\text{Li} + \text{Al} + 13 \text{H}_2$             | 7.97 | 38.0  |
| 135 | $3 \text{Ca}(\text{AlH}_4)_2 + \text{LiNH}_2 \rightarrow \text{Ca}_2\text{N} + \text{Al}_2\text{Ca} + \text{Al}_3\text{Li} + \text{AlH}_3 + 11.5 \text{H}_2$        | 7.05 | 40.3  |
| 136 | $3 \text{Ca}(\text{AlH}_4)_2 + \text{LiNH}_2 \rightarrow \text{Ca}_2\text{N} + \text{CaH}_2 + \text{Al}_3\text{Li} + 3 \text{AlH}_3 + 7.5 \text{H}_2$               | 4.60 | 47.8  |
| 137 | $3 \text{Ca}(\text{AlH}_4)_2 + \text{LiNH}_2 \rightarrow \text{Ca}_2\text{N} + \text{CaH}_2 + \text{AlLi} + 5 \text{AlH}_3 + 4.5 \text{H}_2$                        | 2.76 | 73.5  |
| 138 | $3 \text{Ca}(\text{AlH}_4)_2 + 2 \text{LiNH}_2 \rightarrow 3 \text{CaH}_2 + 2 \text{AlLi} + 2 \text{AlN} + 2 \text{AlH}_3 + 8 \text{H}_2$                           | 4.59 | -19.8 |
| 139 | $3 \text{Ca}(\text{AlH}_4)_2 + 2 \text{LiNH}_2 \rightarrow 3 \text{CaH}_2 + 2 \text{AlLi} + 2 \text{AlN} + 2 \text{Al} + 11 \text{H}_2$                             | 6.31 | -11.4 |
| 140 | $3 \text{Ca}(\text{AlH}_4)_2 + 2 \text{LiNH}_2 \rightarrow \text{CaH}_2 + 2 \text{Al}_2\text{Ca} + 2 \text{AlN} + 2 \text{LiH} + 12 \text{H}_2$                     | 6.88 | -5.9  |
| 141 | $3 \text{Ca}(\text{AlH}_4)_2 + 2 \text{LiNH}_2 \rightarrow 2 \text{CaH}_2 + \text{Al}_2\text{Ca} + 2 \text{AlN} + 2 \text{AlLi} + 12 \text{H}_2$                    | 6.88 | -4.4  |
| 142 | $3 \text{Ca}(\text{AlH}_4)_2 + 2 \text{LiNH}_2 \rightarrow \text{Ca}_2\text{N} + \text{CaLi}_2 + \text{AlN} + 5 \text{Al} + 14 \text{H}_2$                          | 8.03 | 38.6  |
| 143 | $3 \text{Ca}(\text{AlH}_4)_2 + 2 \text{LiNH}_2 \rightarrow \text{Ca}_2\text{N} + \text{CaLi}_2 + \text{AlN} + 5 \text{AlH}_3 + 6.5 \text{H}_2$                      | 3.73 | 70.4  |
| 144 | $3 \text{Ca}(\text{AlH}_4)_2 + 3 \text{LiNH}_2 \rightarrow 3 \text{CaH}_2 + 3 \text{AlN} + \text{Al}_3\text{Li} + 2 \text{LiH} + 11 \text{H}_2$                     | 5.92 | -31.1 |
| 145 | $3 \text{Ca}(\text{AlH}_4)_2 + 3 \text{LiNH}_2 \rightarrow 3 \text{CaH}_2 + \text{Al}_2\text{Li}_3 + 3 \text{AlN}$                                                  | 5.65 | -23.3 |

|     |                                                                                                                                                     |       |                        |
|-----|-----------------------------------------------------------------------------------------------------------------------------------------------------|-------|------------------------|
|     | + AlH <sub>3</sub> + 10.5 H <sub>2</sub>                                                                                                            |       |                        |
| 146 | 3 Ca(AlH <sub>4</sub> ) <sub>2</sub> + 3 LiNH <sub>2</sub> → 3 CaH <sub>2</sub> + Al <sub>2</sub> Li <sub>3</sub> + 3 AlN + Al + 12 H <sub>2</sub>  | 6.46  | -19.0                  |
| 147 | 3 Ca(AlH <sub>4</sub> ) <sub>2</sub> + 3 LiNH <sub>2</sub> → 3 CaH <sub>2</sub> + Li <sub>3</sub> N + 2 AlN + 4 AlH <sub>3</sub> + 6 H <sub>2</sub> | 3.23  | -10.5                  |
| 148 | 3 Ca(AlH <sub>4</sub> ) <sub>2</sub> + 3 LiNH <sub>2</sub> → 3 CaH <sub>2</sub> + Li <sub>3</sub> N + 2 AlN + 4 Al + 12 H <sub>2</sub>              | 6.46  | 0.3                    |
| 149 | 3 Ca(AlH <sub>4</sub> ) <sub>2</sub> + 3 LiNH <sub>2</sub> → 3 CaH <sub>2</sub> + LiN <sub>3</sub> + 2 AlLi + 4 Al + 12 H <sub>2</sub>              | 6.46  | 49.5                   |
| 150 | 3 Ca(AlH <sub>4</sub> ) <sub>2</sub> + 3 LiNH <sub>2</sub> → 3 CaH <sub>2</sub> + LiN <sub>3</sub> + 2 AlLi + 4 AlH <sub>3</sub> + 6 H <sub>2</sub> | 3.23  | 87.9                   |
| 151 | 3 Ca(AlH <sub>4</sub> ) <sub>2</sub> + 5 LiNH <sub>2</sub> → 3 CaH <sub>2</sub> + Li <sub>3</sub> N + 2 AlLi + 4 AlN + 14 H <sub>2</sub>            | 6.71  | -17.0                  |
| 152 | 3 Ca(AlH <sub>4</sub> ) <sub>2</sub> + 5 LiNH <sub>2</sub> → 3 CaH <sub>2</sub> + LiN <sub>3</sub> + 4 AlLi + 2 AlN + 14 H <sub>2</sub>             | 6.71  | 25.1                   |
| 153 | 3 Ca(AlH <sub>4</sub> ) <sub>2</sub> + 6 LiNH <sub>2</sub> → 3 CaH <sub>2</sub> + 3 AlLi + 3 AlN + LiN <sub>3</sub> + 2 LiH + 14 H <sub>2</sub>     | 6.37  | 10.1                   |
| 154 | 4 Ca(AlH <sub>4</sub> ) <sub>2</sub> + 2 LiNH <sub>2</sub> → 3 CaH <sub>2</sub> + CaLi <sub>2</sub> + 2 AlN + 6 Al + 15 H <sub>2</sub>              | 6.67  | 10.8                   |
| 155 | 4 Ca(AlH <sub>4</sub> ) <sub>2</sub> + 2 LiNH <sub>2</sub> → 3 CaH <sub>2</sub> + CaLi <sub>2</sub> + 2 AlN + 6 AlH <sub>3</sub> + 6 H <sub>2</sub> | 2.67  | 10.3                   |
|     | <b>Reactions including Sc</b>                                                                                                                       |       |                        |
| 156 | ScH <sub>2</sub> + 3 Al → Al <sub>3</sub> Sc + H <sub>2</sub>                                                                                       | 1.58  | 19.6                   |
| 157 | ScH <sub>2</sub> + 2 Si → ScSi <sub>2</sub> + H <sub>2</sub>                                                                                        | 1.95  | 95.5                   |
| 158 | ScH <sub>2</sub> + 2 Al → Al <sub>2</sub> Sc + H <sub>2</sub>                                                                                       | 2.00  | 57.9                   |
| 159 | ScH <sub>2</sub> + Si → ScSi + H <sub>2</sub>                                                                                                       | 2.68  | 39.8                   |
| 160 | ScH <sub>2</sub> + Al → AlSc + H <sub>2</sub>                                                                                                       | 2.73  | 111.1                  |
| 161 | 5 ScH <sub>2</sub> + 3 Si → Sc <sub>5</sub> Si <sub>3</sub> + 5 H <sub>2</sub>                                                                      | 3.16  | 81.9                   |
| 162 | 2 ScH <sub>2</sub> + Al → AlSc <sub>2</sub> + 2 H <sub>2</sub>                                                                                      | 3.33  | 148.0                  |
| 163 | ScH <sub>2</sub> → Sc + H <sub>2</sub>                                                                                                              | 4.29  | 200.0                  |
| 164 | ScH <sub>2</sub> + LiNH <sub>2</sub> → ScN + LiH + 1.5 H <sub>2</sub>                                                                               | 4.32  | -43.8                  |
| 165 | 2 ScH <sub>2</sub> + 3 LiNH <sub>2</sub> → Li <sub>3</sub> ScN <sub>2</sub> + ScN + 5 H <sub>2</sub>                                                | 6.19  | 11.3                   |
| 166 | ScH <sub>2</sub> + 2 LiBH <sub>4</sub> → ScB <sub>2</sub> + 2 LiH + 4 H <sub>2</sub>                                                                | 8.91  | 49.7                   |
| 167 | ScH <sub>2</sub> + 12 LiBH <sub>4</sub> → ScB <sub>12</sub> + 12 LiH + 19 H <sub>2</sub>                                                            | 12.42 | 74.1                   |
| 168 | 2 ScH <sub>2</sub> + Al + 2 Si → AlSc <sub>2</sub> Si <sub>2</sub> + 2 H <sub>2</sub>                                                               | 2.28  | 28.9                   |
| 169 | 2 ScH <sub>2</sub> + AlH <sub>3</sub> + 2 Si → AlSc <sub>2</sub> Si <sub>2</sub> + 3.5 H <sub>2</sub>                                               | 3.92  | 21.3                   |
|     | <b>Reactions including Ti</b>                                                                                                                       |       |                        |
| 170 | TiH <sub>2</sub> → Ti + H <sub>2</sub>                                                                                                              | 4.04  | 142.7                  |
| 171 | TiH <sub>2</sub> + LiBH <sub>4</sub> → LiH + TiB + 2.5 H <sub>2</sub><br>(TiB – SG: F 4 3m)                                                         | 7.03  | 162.0 (o)<br>155.6 (h) |
| 172 | TiH <sub>2</sub> + LiBH <sub>4</sub> → LiH + TiB + 2.5 H <sub>2</sub><br>(TiB – SG: Pnma)                                                           | 7.03  | 43.7 (o)<br>37.2 (h)   |
| 173 | TiH <sub>2</sub> + 2 LiBH <sub>4</sub> → 2 LiH + TiB <sub>2</sub> + 4 H <sub>2</sub>                                                                | 8.63  | 22.2 (o)<br>14.1 (h)   |
| 174 | TiH <sub>2</sub> + Si → TiSi + H <sub>2</sub>                                                                                                       | 2.59  | -0.1                   |

|     |                                                                                                                                                                                       |      |        |
|-----|---------------------------------------------------------------------------------------------------------------------------------------------------------------------------------------|------|--------|
| 175 | $\text{TiH}_2 + 2 \text{ Si} \rightarrow \text{TiSi}_2 + \text{H}_2$                                                                                                                  | 1.90 | -6.2   |
| 176 | $5 \text{ TiH}_2 + 3 \text{ Si} \rightarrow \text{Ti}_5\text{Si}_3 + 5 \text{ H}_2$                                                                                                   | 3.02 | 28.4   |
| 177 | $5 \text{ TiH}_2 + 4 \text{ Si} \rightarrow \text{Ti}_5\text{Si}_4 + 5 \text{ H}_2$                                                                                                   | 2.79 | 10.6   |
| 178 | $\text{TiH}_2 + \text{Al} \rightarrow \text{AlTi} + \text{H}_2$                                                                                                                       | 2.62 | 63.3   |
| 179 | $\text{TiH}_2 + 2 \text{ Al} \rightarrow \text{Al}_2\text{Ti} + \text{H}_2$<br>( $\text{Al}_2\text{Ti}$ – SG: Cmmm)                                                                   | 1.94 | 18.5   |
| 180 | $\text{TiH}_2 + 2 \text{ Al} \rightarrow \text{Al}_2\text{Ti} + \text{H}_2$<br>( $\text{Al}_2\text{Ti}$ – SG: $I4_1/amd$ )                                                            | 1.94 | 17.2   |
| 181 | $\text{TiH}_2 + 3 \text{ Al} \rightarrow \text{Al}_3\text{Ti} + \text{H}_2$                                                                                                           | 1.54 | -11.9  |
| 182 | $3 \text{ TiH}_2 + \text{Al} \rightarrow \text{AlTi}_3 + \text{H}_2$                                                                                                                  | 1.14 | 106.5  |
| 183 | $\text{TiH}_2 + \text{LiNH}_2 \rightarrow \text{LiH} + \text{TiN} + 2 \text{ H}_2$                                                                                                    | 5.53 | -46.4  |
| 184 | $2 \text{ TiH}_2 + \text{LiNH}_2 \rightarrow \text{LiH} + \text{Ti}_2\text{N} + 2.5 \text{ H}_2$<br>( $\text{Ti}_2\text{N}$ – SG: $I4_1/amd$ )                                        | 4.11 | 11.7   |
| 185 | $2 \text{ TiH}_2 + \text{LiNH}_2 \rightarrow \text{LiH} + \text{Ti}_2\text{N} + 2.5 \text{ H}_2$<br>( $\text{Ti}_2\text{N}$ – SG: $P4_2/mnm$ )                                        | 4.11 | 9.2    |
| 186 | $3 \text{ TiH}_2 + \text{Al} + \text{C} \rightarrow \text{Ti}_3\text{AlC} + 3 \text{ H}_2$                                                                                            | 3.21 | 50.1   |
| 187 | $3 \text{ TiH}_2 + \text{Al} + \text{LiNH}_2 \rightarrow \text{LiH} + \text{Ti}_3\text{AlN} + 3.5 \text{ H}_2$                                                                        | 3.53 | 26.1   |
| 188 | $3 \text{ TiH}_2 + 2 \text{ Al} + \text{LiNH}_2 \rightarrow \text{AlLi} + \text{Ti}_3\text{AlN} + 4 \text{ H}_2$                                                                      | 3.56 | 34.1   |
| 189 | $3 \text{ TiH}_2 + 3 \text{ Al} + \text{LiNH}_2 \rightarrow \text{Al}_3\text{Li} + \text{Ti}_3\text{AlN} + 4 \text{ H}_2$                                                             | 3.18 | -56.5  |
| 190 | $3 \text{ TiH}_2 + 2 \text{ Al} + 3 \text{ LiNH}_2 \rightarrow \text{AlLi}_3\text{N}_2 + \text{Ti}_3\text{AlN} + 6 \text{ H}_2$                                                       | 4.44 | 10.0   |
| 191 | $4 \text{ TiH}_2 + 3 \text{ Al} + \text{LiNH}_2 \rightarrow \text{Al}_2\text{Ti} + \text{Ti}_3\text{AlN} + \text{LiH} + 5 \text{ H}_2$<br>( $\text{Al}_2\text{Ti}$ – SG: Cmmm)        | 3.32 | -43.6  |
| 192 | $4 \text{ TiH}_2 + 3 \text{ Al} + \text{LiNH}_2 \rightarrow \text{Al}_2\text{Ti} + \text{Ti}_3\text{AlN} + \text{LiH} + 5 \text{ H}_2$<br>( $\text{Al}_2\text{Ti}$ – SG: $I4_1/amd$ ) | 3.32 | -43.8  |
| 193 | $9 \text{ TiH}_2 + 5 \text{ Al} + 3 \text{ LiNH}_2 \rightarrow \text{Al}_2\text{Li}_3 + 3 \text{ Ti}_3\text{AlN} + 12 \text{ H}_2$                                                    | 3.71 | 35.6   |
| 194 | $27 \text{ TiH}_2 + 13 \text{ Al} + 9 \text{ LiNH}_2 \rightarrow \text{Al}_4\text{Li}_9 + 9 \text{ Ti}_3\text{AlN} + 36 \text{ H}_2$                                                  | 3.81 | 38.0   |
| 195 | $2 \text{ TiH}_2 + \text{Al} + \text{LiNH}_2 \rightarrow \text{LiH} + \text{Ti}_2\text{AlN} + 2.5 \text{ H}_2$                                                                        | 3.37 | -19.3  |
| 196 | $2 \text{ TiH}_2 + 2 \text{ Al} + \text{LiNH}_2 \rightarrow \text{AlLi} + \text{Ti}_2\text{AlN} + 3 \text{ H}_2$                                                                      | 3.42 | -1.1   |
| 197 | $2 \text{ TiH}_2 + 3 \text{ Al} + \text{LiNH}_2 \rightarrow \text{Al}_3\text{Li} + \text{Ti}_2\text{AlN} + 3 \text{ H}_2$                                                             | 2.97 | -121.7 |
| 198 | $2 \text{ TiH}_2 + 2 \text{ Al} + 3 \text{ LiNH}_2 \rightarrow \text{AlLi}_3\text{N}_2 + \text{Ti}_2\text{AlN} + 5 \text{ H}_2$                                                       | 4.53 | -15.9  |
| 199 | $3 \text{ TiH}_2 + 3 \text{ Al} + \text{LiNH}_2 \rightarrow \text{Al}_2\text{Ti} + \text{Ti}_2\text{AlN} + \text{LiH} + 4 \text{ H}_2$<br>( $\text{Al}_2\text{Ti}$ – SG: Cmmm)        | 3.18 | -89.3  |
| 200 | $3 \text{ TiH}_2 + 3 \text{ Al} + \text{LiNH}_2 \rightarrow \text{Al}_2\text{Ti} + \text{Ti}_2\text{AlN} + \text{LiH} + 4 \text{ H}_2$<br>( $\text{Al}_2\text{Ti}$ – SG: $I4_1/amd$ ) | 3.18 | -89.6  |
| 201 | $6 \text{ TiH}_2 + 5 \text{ Al} + 3 \text{ LiNH}_2 \rightarrow \text{Al}_2\text{Li}_3 + 3 \text{ Ti}_2\text{AlN} + 9 \text{ H}_2$                                                     | 3.61 | 1.0    |
| 202 | $18 \text{ TiH}_2 + 13 \text{ Al} + 9 \text{ LiNH}_2 \rightarrow \text{Al}_4\text{Li}_9 + 9 \text{ Ti}_2\text{AlN} + 27 \text{ H}_2$                                                  | 3.74 | 4.1    |
| 203 | $4 \text{ TiH}_2 + \text{Al} + 3 \text{ LiNH}_2 \rightarrow 3 \text{ LiH} + \text{Ti}_4\text{AlN}_3 + 5.5 \text{ H}_2$                                                                | 3.75 | -37.7  |
| 204 | $4 \text{ TiH}_2 + 4 \text{ Al} + 3 \text{ LiNH}_2 \rightarrow 3 \text{ AlLi} + \text{Ti}_4\text{AlN}_3 + 7 \text{ H}_2$                                                              | 3.75 | -10.3  |
| 205 | $4 \text{ TiH}_2 + 10 \text{ Al} + 3 \text{ LiNH}_2 \rightarrow 3 \text{ Al}_3\text{Li} + \text{Ti}_4\text{AlN}_3 + 7 \text{ H}_2$                                                    | 2.62 | -12.7  |
| 206 | $4 \text{ TiH}_2 + 4 \text{ Al} + 5 \text{ LiNH}_2 \rightarrow 2 \text{ AlLi} + \text{AlLi}_3\text{N}_2 + \text{Ti}_4\text{AlN}_3 + 9 \text{ H}_2$                                    | 4.30 | -16.5  |



|     |                                                                                                                                                                                              |      |                        |
|-----|----------------------------------------------------------------------------------------------------------------------------------------------------------------------------------------------|------|------------------------|
| 207 | $5 \text{ TiH}_2 + 3 \text{ Al} + 3 \text{ LiNH}_2 \rightarrow \text{Al}_2\text{Ti} + \text{Ti}_4\text{AlN}_3 + 3 \text{ LiH} + 6.5 \text{ H}_2$ ( $\text{Al}_2\text{Ti}$ – SG: Cmmm)        | 3.28 | -29.0                  |
| 208 | $5 \text{ TiH}_2 + 3 \text{ Al} + 3 \text{ LiNH}_2 \rightarrow \text{Al}_2\text{Ti} + \text{Ti}_4\text{AlN}_3 + 3 \text{ LiH} + 6.5 \text{ H}_2$ ( $\text{Al}_2\text{Ti}$ – SG: $I4_1/amd$ ) | 3.28 | -29.2                  |
| 209 | $4 \text{ TiH}_2 + 3 \text{ Al} + 3 \text{ LiNH}_2 \rightarrow \text{Al}_2\text{Li}_3 + \text{Ti}_4\text{AlN}_3 + 7 \text{ H}_2$                                                             | 4.04 | -7.7                   |
| 210 | $12 \text{ TiH}_2 + 7 \text{ Al} + 9 \text{ LiNH}_2 \rightarrow \text{Al}_4\text{Li}_9 + 3 \text{ Ti}_4\text{AlN}_3 + 21 \text{ H}_2$                                                        | 4.26 | -3.6                   |
| 211 | $\text{TiH} \rightarrow \text{Ti} + 0.5 \text{ H}_2$                                                                                                                                         | 2.06 | 139.7                  |
| 212 | $\text{TiH} + \text{LiBH}_4 \rightarrow \text{LiH} + \text{TiB} + 2 \text{ H}_2$<br>(TiB – SG: $F\bar{4}3m$ )                                                                                | 5.71 | 166.1 (o)<br>158.0 (h) |
| 213 | $\text{TiH} + \text{LiBH}_4 \rightarrow \text{LiH} + \text{TiB} + 2 \text{ H}_2$<br>(TiB – SG: Pnma)                                                                                         | 5.71 | 18.2 (o)<br>10.1 (h)   |
| 214 | $\text{TiH} + 2 \text{ LiBH}_4 \rightarrow 2 \text{ LiH} + \text{TiB}_2 + 3.5 \text{ H}_2$                                                                                                   | 7.63 | 4.5 (o)<br>-4.7 (h)    |
| 215 | $\text{TiH} + \text{Si} \rightarrow \text{TiSi} + 0.5 \text{ H}_2$                                                                                                                           | 1.31 | -145.8                 |
| 216 | $\text{TiH} + 2 \text{ Si} \rightarrow \text{TiSi}_2 + 0.5 \text{ H}_2$                                                                                                                      | 0.96 | -158.0                 |
| 217 | $5 \text{ TiH} + 3 \text{ Si} \rightarrow \text{Ti}_5\text{Si}_3 + 2.5 \text{ H}_2$                                                                                                          | 1.53 | -88.9                  |
| 218 | $5 \text{ TiH} + 4 \text{ Si} \rightarrow \text{Ti}_5\text{Si}_4 + 2.5 \text{ H}_2$                                                                                                          | 1.41 | -124.5                 |
| 219 | $\text{TiH} + \text{Al} \rightarrow \text{AlTi} + 0.5 \text{ H}_2$                                                                                                                           | 1.33 | -19.2                  |
| 220 | $\text{TiH} + 2 \text{ Al} \rightarrow \text{Al}_2\text{Ti} + 0.5 \text{ H}_2$<br>( $\text{Al}_2\text{Ti}$ – SG: Cmmm)                                                                       | 0.98 | -108.6                 |
| 221 | $\text{TiH} + 2 \text{ Al} \rightarrow \text{Al}_2\text{Ti} + 0.5 \text{ H}_2$<br>( $\text{Al}_2\text{Ti}$ – SG: $I4_1/amd$ )                                                                | 0.98 | -111.3                 |
| 222 | $\text{TiH} + 3 \text{ Al} \rightarrow \text{Al}_3\text{Ti} + 0.5 \text{ H}_2$                                                                                                               | 0.78 | -169.4                 |
| 223 | $3 \text{ TiH} + \text{Al} \rightarrow \text{AlTi}_3 + 1.5 \text{ H}_2$                                                                                                                      | 1.74 | 67.2                   |
| 224 | $\text{TiH} + \text{LiNH}_2 \rightarrow \text{LiH} + \text{TiN} + \text{H}_2$                                                                                                                | 2.81 | -142.4                 |
| 225 | $2 \text{ TiH} + \text{LiNH}_2 \rightarrow \text{LiH} + \text{Ti}_2\text{N} + 1.5 \text{ H}_2$<br>( $\text{Ti}_2\text{N}$ – SG: $I4_1/amd$ )                                                 | 2.50 | -77.6                  |
| 226 | $2 \text{ TiH} + \text{LiNH}_2 \rightarrow \text{LiH} + \text{Ti}_2\text{N} + 1.5 \text{ H}_2$<br>( $\text{Ti}_2\text{N}$ – SG: $P4_2/mnm$ )                                                 | 2.50 | -81.9                  |
| 227 | $3 \text{ TiH} + \text{Al} + \text{LiNH}_2 \rightarrow \text{LiH} + \text{Ti}_3\text{AlN} + 2 \text{ H}_2$                                                                                   | 2.05 | -63.7                  |
| 228 | $3 \text{ TiH} + 2 \text{ Al} + \text{LiNH}_2 \rightarrow \text{AlLi} + \text{Ti}_3\text{AlN} + 2.5 \text{ H}_2$                                                                             | 2.25 | -32.9                  |
| 229 | $3 \text{ TiH} + 3 \text{ Al} + \text{LiNH}_2 \rightarrow \text{Al}_3\text{Li} + \text{Ti}_3\text{AlN} + 2.5 \text{ H}_2$                                                                    | 2.01 | -177.7                 |
| 230 | $3 \text{ TiH} + 2 \text{ Al} + 3 \text{ LiNH}_2 \rightarrow \text{AlLi}_3\text{N}_2 + \text{Ti}_3\text{AlN} + 4.5 \text{ H}_2$                                                              | 3.37 | -35.3                  |
| 231 | $4 \text{ TiH} + 3 \text{ Al} + \text{LiNH}_2 \rightarrow \text{Al}_2\text{Ti} + \text{Ti}_3\text{AlN} + \text{LiH} + 3 \text{ H}_2$ ( $\text{Al}_2\text{Ti}$ – SG: Cmmm)                    | 2.02 | -169.7                 |
| 232 | $4 \text{ TiH} + 3 \text{ Al} + \text{LiNH}_2 \rightarrow \text{Al}_2\text{Ti} + \text{Ti}_3\text{AlN} + \text{LiH} + 3 \text{ H}_2$ ( $\text{Al}_2\text{Ti}$ – SG: $I4_1/amd$ )             | 2.02 | -170.1                 |
| 233 | $9 \text{ TiH} + 5 \text{ Al} + 3 \text{ LiNH}_2 \rightarrow \text{Al}_2\text{Li}_3 + 3 \text{ Ti}_3\text{AlN} + 7.5 \text{ H}_2$                                                            | 2.35 | -30.5                  |
| 234 | $27 \text{ TiH} + 13 \text{ Al} + 9 \text{ LiNH}_2 \rightarrow \text{Al}_4\text{Li}_9 + 9 \text{ Ti}_3\text{AlN} + 22.5 \text{ H}_2$                                                         | 2.42 | -26.7                  |
| 235 | $2 \text{ TiH} + \text{Al} + \text{LiNH}_2 \rightarrow \text{LiH} + \text{Ti}_2\text{AlN} + 1.5 \text{ H}_2$                                                                                 | 2.05 | -129.3                 |
| 236 | $2 \text{ TiH} + 2 \text{ Al} + \text{LiNH}_2 \rightarrow \text{AlLi} + \text{Ti}_2\text{AlN} + 2 \text{ H}_2$                                                                               | 2.31 | -74.4                  |

|     |                                                                                                                                                                                              |      |                     |
|-----|----------------------------------------------------------------------------------------------------------------------------------------------------------------------------------------------|------|---------------------|
| 237 | $2 \text{ TiH} + 3 \text{ Al} + \text{LiNH}_2 \rightarrow \text{Al}_3\text{Li} + \text{Ti}_2\text{AlN} + 2 \text{ H}_2$                                                                      | 2.00 | -255.4              |
| 238 | $2 \text{ TiH} + 2 \text{ Al} + 3 \text{ LiNH}_2 \rightarrow \text{AlLi}_3\text{N}_2 + \text{Ti}_2\text{AlN} + 4 \text{ H}_2$                                                                | 3.65 | -56.3               |
| 239 | $3 \text{ TiH} + 3 \text{ Al} + \text{LiNH}_2 \rightarrow \text{Al}_2\text{Ti} + \text{Ti}_2\text{AlN} + \text{LiH} + 2.5 \text{ H}_2$ (Al <sub>2</sub> Ti – SG: Cmmm)                       | 2.01 | -230.2              |
| 240 | $3 \text{ TiH} + 3 \text{ Al} + \text{LiNH}_2 \rightarrow \text{Al}_2\text{Ti} + \text{Ti}_2\text{AlN} + \text{LiH} + 2.5 \text{ H}_2$ (Al <sub>2</sub> Ti – SG: I4 <sub>1</sub> /amd)       | 2.01 | -230.8              |
| 241 | $6 \text{ TiH} + 5 \text{ Al} + 3 \text{ LiNH}_2 \rightarrow \text{Al}_2\text{Li}_3 + 3 \text{ Ti}_2\text{AlN} + 6 \text{ H}_2$                                                              | 2.43 | -71.4               |
| 242 | $18 \text{ TiH} + 13 \text{ Al} + 9 \text{ LiNH}_2 \rightarrow \text{Al}_4\text{Li}_9 + 9 \text{ Ti}_2\text{AlN} + 18 \text{ H}_2$                                                           | 2.52 | -66.6               |
| 243 | $4 \text{ TiH} + \text{Al} + 3 \text{ LiNH}_2 \rightarrow 3 \text{ LiH} + \text{Ti}_4\text{AlN}_3 + 3.5 \text{ H}_2$                                                                         | 2.42 | -142.4              |
| 244 | $4 \text{ TiH} + 4 \text{ Al} + 3 \text{ LiNH}_2 \rightarrow 3 \text{ AlLi} + \text{Ti}_4\text{AlN}_3 + 5 \text{ H}_2$                                                                       | 2.71 | -72.7               |
| 245 | $4 \text{ TiH} + 10 \text{ Al} + 3 \text{ LiNH}_2 \rightarrow 3 \text{ Al}_3\text{Li} + \text{Ti}_4\text{AlN}_3 + 5 \text{ H}_2$                                                             | 1.89 | -76.0               |
| 246 | $4 \text{ TiH} + 4 \text{ Al} + 5 \text{ LiNH}_2 \rightarrow 2 \text{ AlLi} + \text{AlLi}_3\text{N}_2 + \text{Ti}_4\text{AlN}_3 + 7 \text{ H}_2$                                             | 3.37 | -62.8               |
| 247 | $5 \text{ TiH} + 3 \text{ Al} + 3 \text{ LiNH}_2 \rightarrow \text{Al}_2\text{Ti} + \text{Ti}_4\text{AlN}_3 + 3 \text{ LiH} + 4 \text{ H}_2$ (Al <sub>2</sub> Ti – SG: Cmmm)                 | 2.05 | -138.2              |
| 248 | $5 \text{ TiH} + 3 \text{ Al} + 3 \text{ LiNH}_2 \rightarrow \text{Al}_2\text{Ti} + \text{Ti}_4\text{AlN}_3 + 3 \text{ LiH} + 4 \text{ H}_2$ (Al <sub>2</sub> Ti – SG: I4 <sub>1</sub> /amd) | 2.05 | -138.5              |
| 249 | $4 \text{ TiH} + 3 \text{ Al} + 3 \text{ LiNH}_2 \rightarrow \text{Al}_2\text{Li}_3 + \text{Ti}_4\text{AlN}_3 + 5 \text{ H}_2$                                                               | 2.92 | -69.0               |
| 250 | $12 \text{ TiH} + 7 \text{ Al} + 9 \text{ LiNH}_2 \rightarrow \text{Al}_4\text{Li}_9 + 3 \text{ Ti}_4\text{AlN}_3 + 15 \text{ H}_2$                                                          | 3.08 | -63.3               |
|     | <b>Reactions including V</b>                                                                                                                                                                 |      |                     |
| 251 | $\text{VH}_2 \rightarrow \text{V} + \text{H}_2$                                                                                                                                              | 3.81 | 63.3                |
| 252 | $2 \text{ VH}_2 \rightarrow \text{V}_2\text{H} + 1.5 \text{ H}_2$ (V <sub>2</sub> H – SG: I4 <sub>1</sub> /amd)                                                                              | 2.86 | 57.4                |
| 253 | $2 \text{ VH}_2 \rightarrow \text{V}_2\text{H} + 1.5 \text{ H}_2$ (V <sub>2</sub> H – SG: Cm)                                                                                                | 2.86 | 57.2                |
| 254 | $\text{VH}_2 + 3 \text{ Al} \rightarrow \text{Al}_3\text{V} + \text{H}_2$                                                                                                                    | 1.51 | -47.0               |
| 255 | $\text{VH}_2 + 10 \text{ Al} \rightarrow \text{Al}_{10}\text{V} + \text{H}_2$                                                                                                                | 0.62 | -48.6               |
| 256 | $3 \text{ VH}_2 + \text{Al} \rightarrow \text{AlV}_3 + 3 \text{ H}_2$                                                                                                                        | 3.25 | 46.6                |
| 257 | $\text{VH}_2 + 2 \text{ Si} \rightarrow \text{VSi}_2 + \text{H}_2$                                                                                                                           | 1.85 | -60.9               |
| 258 | $3 \text{ VH}_2 + \text{Si} \rightarrow \text{V}_3\text{Si} + 3 \text{ H}_2$                                                                                                                 | 3.23 | 5.2                 |
| 259 | $6 \text{ VH}_2 + 5 \text{ Si} \rightarrow \text{V}_6\text{Si}_5 + 6 \text{ H}_2$                                                                                                            | 2.64 | -25.3               |
| 260 | $\text{VH}_2 + \text{LiNH}_2 \rightarrow \text{VN} + \text{LiH} + 1.5 \text{ H}_2$                                                                                                           | 3.98 | -5.4                |
| 261 | $2 \text{ VH}_2 + 3 \text{ LiNH}_2 \rightarrow 2 \text{ VN} + \text{Li}_3\text{N} + 5 \text{ H}_2$                                                                                           | 5.77 | 40.5                |
| 262 | $4 \text{ VH}_2 + 7 \text{ LiNH}_2 \rightarrow \text{Li}_7\text{N}_4\text{V} + 3 \text{ VN} + 11 \text{ H}_2$ (Li <sub>7</sub> N <sub>4</sub> V – SG: P4̄3n)                                 | 5.95 | 14.3                |
| 263 | $4 \text{ VH}_2 + 7 \text{ LiNH}_2 \rightarrow \text{Li}_7\text{N}_4\text{V} + 3 \text{ VN} + 11 \text{ H}_2$ (Li <sub>7</sub> N <sub>4</sub> V – SG: Pā3)                                  | 5.95 | 14.1                |
| 264 | $4 \text{ VH}_2 + 7 \text{ LiNH}_2 \rightarrow \text{Li}_7\text{N}_4\text{V} + 3 \text{ VN} + 11 \text{ H}_2$ (Li <sub>7</sub> N <sub>4</sub> V – SG: P4 <sub>2</sub> /nmc)                  | 5.95 | 14.8                |
| 265 | $\text{VH}_2 + \text{LiBH}_4 \rightarrow \text{VB} + \text{LiH} + 2.5 \text{ H}_2$                                                                                                           | 6.74 | 11.6 (o)<br>5.1 (h) |
| 266 | $\text{VH}_2 + 2 \text{ LiBH}_4 \rightarrow \text{VB}_2 + 2 \text{ LiH} + 4 \text{ H}_2$                                                                                                     | 8.35 | 25.5 (o)            |

|     |                                                                                                                                                                                               |      |                          |
|-----|-----------------------------------------------------------------------------------------------------------------------------------------------------------------------------------------------|------|--------------------------|
|     |                                                                                                                                                                                               |      | 17.4 (h)                 |
| 267 | $2 \text{ VH}_2 + 3 \text{ LiBH}_4 \rightarrow \text{V}_2\text{B}_3 + 3 \text{ LiH} + 6.5 \text{ H}_2$                                                                                        | 7.65 | 19.0 (o)<br>11.5 (h)     |
| 268 | $3 \text{ VH}_2 + 2 \text{ LiBH}_4 \rightarrow \text{V}_3\text{B}_2 + 2 \text{ LiH} + 6 \text{ H}_2$                                                                                          | 5.98 | 16.3 (o)<br>10.9 (h)     |
| 269 | $\text{VH}_2 + 4 \text{ LiNH}_2 + 3 \text{ LiH} \rightarrow \text{Li}_7\text{N}_4\text{V} + 6.5 \text{ H}_2$ ( $\text{Li}_7\text{N}_4\text{V}$ – SG: $\text{P}\bar{4}3\text{n}$ )             | 7.77 | 28.0                     |
| 270 | $\text{VH}_2 + 4 \text{ LiNH}_2 + 3 \text{ LiH} \rightarrow \text{Li}_7\text{N}_4\text{V} + 6.5 \text{ H}_2$ ( $\text{Li}_7\text{N}_4\text{V}$ – SG: $\text{Pa}\bar{3}$ )                     | 7.77 | 27.5                     |
| 271 | $\text{VH}_2 + 4 \text{ LiNH}_2 + 3 \text{ LiH} \rightarrow \text{Li}_7\text{N}_4\text{V} + 6.5 \text{ H}_2$ ( $\text{Li}_7\text{N}_4\text{V}$ – SG: $\text{P4}_2/\text{nmc}$ )               | 7.77 | 28.7                     |
| 272 | $3 \text{ VH}_2 + 2 \text{ ScH}_2 + 4 \text{ Si} \rightarrow \text{Sc}_2\text{V}_3\text{Si}_4 + 5 \text{ H}_2$                                                                                | 3.17 | -7.7                     |
| 273 | $\text{VH}_2 + 3 \text{ CaH}_2 + 3 \text{ LiNH}_2 \rightarrow \text{Ca}_3\text{N}_3\text{V} + 3 \text{ LiH} + 5.5 \text{ H}_2$                                                                | 4.47 | 35.0                     |
| 274 | $\text{VH}_2 + 2 \text{ CaH}_2 + 3 \text{ LiNH}_2 \rightarrow \text{Ca}_2\text{N}_3\text{V} + 3 \text{ LiH} + 4.5 \text{ H}_2$                                                                | 4.40 | 12.3                     |
|     | <b>Using <math>\text{V}_2\text{H}</math> with SG: <math>\text{I4}_1/\text{amd}</math></b>                                                                                                     |      |                          |
| 275 | $\text{V}_2\text{H} \rightarrow 2 \text{ V} + 0.5 \text{ H}_2$                                                                                                                                | 1.94 | 80.9                     |
| 276 | $\text{V}_2\text{H} + 6 \text{ Al} \rightarrow 2 \text{ Al}_3\text{V} + 0.5 \text{ H}_2$                                                                                                      | 0.47 | -360.1                   |
| 277 | $\text{V}_2\text{H} + 20 \text{ Al} \rightarrow 2 \text{ Al}_{10}\text{V} + 0.5 \text{ H}_2$                                                                                                  | 0.17 | -366.7                   |
| 278 | $3 \text{ V}_2\text{H} + 2 \text{ Al} \rightarrow 2 \text{ AlV}_3 + 1.5 \text{ H}_2$                                                                                                          | 1.44 | 14.0                     |
| 279 | $\text{V}_2\text{H} + 4 \text{ Si} \rightarrow 2 \text{ VSi}_2 + 0.5 \text{ H}_2$                                                                                                             | 0.61 | -416.0                   |
| 280 | $3 \text{ V}_2\text{H} + 2 \text{ Si} \rightarrow 2 \text{ V}_3\text{Si} + 1.5 \text{ H}_2$                                                                                                   | 1.43 | -151.3                   |
| 281 | $3 \text{ V}_2\text{H} + 5 \text{ Si} \rightarrow \text{V}_6\text{Si}_5 + 1.5 \text{ H}_2$                                                                                                    | 1.02 | -273.5                   |
| 282 | $\text{V}_2\text{H} + 2 \text{ LiNH}_2 \rightarrow 2 \text{ VN} + 2 \text{ LiH} + 1.5 \text{ H}_2$                                                                                            | 3.09 | -68.2                    |
| 283 | $\text{V}_2\text{H} + 3 \text{ LiNH}_2 \rightarrow 2 \text{ VN} + \text{Li}_3\text{N} + 3.5 \text{ H}_2$                                                                                      | 5.84 | 33.3                     |
| 284 | $4 \text{ V}_2\text{H} + 14 \text{ LiNH}_2 \rightarrow 2 \text{ Li}_7\text{N}_4\text{V} + 6 \text{ VN} + 16 \text{ H}_2$ ( $\text{Li}_7\text{N}_4\text{V}$ – SG: $\text{P}\bar{4}3\text{n}$ ) | 6.09 | -1.8                     |
| 285 | $4 \text{ V}_2\text{H} + 14 \text{ LiNH}_2 \rightarrow 2 \text{ Li}_7\text{N}_4\text{V} + 6 \text{ VN} + 16 \text{ H}_2$ ( $\text{Li}_7\text{N}_4\text{V}$ – SG: $\text{Pa}\bar{3}$ )         | 6.09 | -2.2                     |
| 286 | $4 \text{ V}_2\text{H} + 14 \text{ LiNH}_2 \rightarrow 2 \text{ Li}_7\text{N}_4\text{V} + 6 \text{ VN} + 16 \text{ H}_2$ ( $\text{Li}_7\text{N}_4\text{V}$ – SG: $\text{P4}_2/\text{nmc}$ )   | 6.09 | -1.2                     |
| 287 | $\text{V}_2\text{H} + 2 \text{ LiBH}_4 \rightarrow 2 \text{ VB} + 2 \text{ LiH} + 3.5 \text{ H}_2$                                                                                            | 7.39 | -8.1 (o)<br>-17.4 (h)    |
| 288 | $\text{V}_2\text{H} + 3 \text{ LiBH}_4 \rightarrow \text{V}_2\text{B}_3 + 3 \text{ LiH} + 5 \text{ H}_2$                                                                                      | 8.59 | 341.7 (o)<br>331.9 (h)   |
| 289 | $\text{V}_2\text{H} + 4 \text{ LiBH}_4 \rightarrow 2 \text{ VB}_2 + 4 \text{ LiH} + 6.5 \text{ H}_2$                                                                                          | 9.42 | -496.1 (o)<br>-506.1 (h) |
| 290 | $3 \text{ V}_2\text{H} + 4 \text{ LiBH}_4 \rightarrow 2 \text{ V}_3\text{B}_2 + 4 \text{ LiH} + 7.5 \text{ H}_2$                                                                              | 6.22 | -8.4 (o)<br>-17.0 (h)    |
| 291 | $\text{V}_2\text{H} + 8 \text{ LiNH}_2 + 6 \text{ LiH} \rightarrow 2 \text{ Li}_7\text{N}_4\text{V} + 11.5 \text{ H}_2$ ( $\text{Li}_7\text{N}_4\text{V}$ – SG: $\text{P}\bar{4}3\text{n}$ )  | 8.18 | 24.2                     |
| 292 | $\text{V}_2\text{H} + 8 \text{ LiNH}_2 + 6 \text{ LiH} \rightarrow 2 \text{ Li}_7\text{N}_4\text{V} + 11.5 \text{ H}_2$ ( $\text{Li}_7\text{N}_4\text{V}$ – SG: $\text{Pa}\bar{3}$ )          | 8.18 | 23.6                     |

|     |                                                                                                  |       |                          |
|-----|--------------------------------------------------------------------------------------------------|-------|--------------------------|
| 293 | $V_2H + 8 LiNH_2 + 6 LiH \rightarrow 2 Li_7N_4V + 11.5 H_2$<br>( $Li_7N_4V$ – SG: $P4_2/nmc$ )   | 8.18  | 25.0                     |
| 294 | $3 V_2H + 4 ScH_2 + 8 Si \rightarrow 2 Sc_2V_3Si_4 + 5.5 H_2$                                    | 2.91  | -61.1                    |
|     | <b>Using <math>V_2H</math> with SG: Cm</b>                                                       |       |                          |
| 295 | $V_2H \rightarrow 2 V + 0.5 H_2$                                                                 | 1.94  | 81.6                     |
| 296 | $V_2H + 6 Al \rightarrow 2 Al_3V + 0.5 H_2$                                                      | 0.47  | -359.5                   |
| 297 | $V_2H + 20 Al \rightarrow 2 Al_{10}V + 0.5 H_2$                                                  | 1.70  | -366.1                   |
| 298 | $3 V_2H + 2 Al \rightarrow 2 AlV_3 + 1.5 H_2$                                                    | 1.44  | 14.6                     |
| 299 | $V_2H + 4 Si \rightarrow 2 VSi_2 + 0.5 H_2$                                                      | 0.61  | -415.4                   |
| 300 | $3 V_2H + 2 Si \rightarrow 2 V_3Si + 1.5 H_2$                                                    | 1.43  | -150.7                   |
| 301 | $3 V_2H + 5 Si \rightarrow V_6Si_5 + 1.5 H_2$                                                    | 1.02  | -272.8                   |
| 302 | $V_2H + 2 LiNH_2 \rightarrow 2 VN + 2 LiH + 1.5 H_2$                                             | 3.09  | -68.0                    |
| 303 | $V_2H + 3 LiNH_2 \rightarrow 2 VN + Li_3N + 3.5 H_2$                                             | 5.84  | 33.4                     |
| 304 | $4 V_2H + 14 LiNH_2 \rightarrow 2 Li_7N_4V + 6 VN + 16 H_2$<br>( $Li_7N_4V$ – SG: $P\bar{4}3n$ ) | 6.09  | -1.7                     |
| 305 | $4 V_2H + 14 LiNH_2 \rightarrow 2 Li_7N_4V + 6 VN + 16 H_2$<br>( $Li_7N_4V$ – SG: $Pa\bar{3}$ )  | 6.09  | -2.1                     |
| 306 | $4 V_2H + 14 LiNH_2 \rightarrow 2 Li_7N_4V + 6 VN + 16 H_2$<br>( $Li_7N_4V$ – SG: $P4_2/nmc$ )   | 6.09  | -1.2                     |
| 307 | $V_2H + 2 LiBH_4 \rightarrow 2 VB + 2 LiH + 3.5 H_2$                                             | 7.39  | -8.0 (o)<br>-17.7 (h)    |
| 308 | $V_2H + 3 LiBH_4 \rightarrow V_2B_3 + 3 LiH + 5 H_2$                                             | 8.59  | 341.7 (o)<br>332.0 (h)   |
| 309 | $V_2H + 4 LiBH_4 \rightarrow 2 VB_2 + 4 LiH + 6.5 H_2$                                           | 9.42  | -496.1 (o)<br>-506.0 (h) |
| 310 | $3 V_2H + 4 LiBH_4 \rightarrow 2 V_3B_2 + 4 LiH + 7.5 H_2$                                       | 6.22  | -8.3 (o)<br>-16.9 (h)    |
| 311 | $V_2H + 8 LiNH_2 + 6 LiH \rightarrow 2 Li_7N_4V + 11.5 H_2$<br>( $Li_7N_4V$ – SG: $P\bar{4}3n$ ) | 8.18  | 24.2                     |
| 312 | $V_2H + 8 LiNH_2 + 6 LiH \rightarrow 2 Li_7N_4V + 11.5 H_2$<br>( $Li_7N_4V$ – SG: $Pa\bar{3}$ )  | 8.18  | 23.6                     |
| 313 | $V_2H + 8 LiNH_2 + 6 LiH \rightarrow 2 Li_7N_4V + 11.5 H_2$<br>( $Li_7N_4V$ – SG: $P4_2/nmc$ )   | 8.18  | 25.0                     |
| 314 | $3 V_2H + 4 ScH_2 + 8 Si \rightarrow 2 Sc_2V_3Si_4 + 5.5 H_2$                                    | 2.91  | -60.9                    |
|     | <b>Reactions including C</b>                                                                     |       |                          |
| 315 | $ScH_2 + C \rightarrow ScC + H_2$                                                                | 3.42  | 163.6                    |
| 316 | $2 ScH_2 + C \rightarrow Sc_2C + 2 H_2$                                                          | 3.81  | 134.4                    |
| 317 | $2 ScH_2 + 3 C \rightarrow Sc_2C_3 + 2 H_2$                                                      | 3.10  | 123.6                    |
| 318 | $3 ScH_2 + 4 C \rightarrow Sc_3C_4 + 3 H_2$                                                      | 3.20  | 99.0                     |
| 319 | $4 ScH_2 + 3 C \rightarrow Sc_4C_3 + 4 H_2$                                                      | 3.60  | 109.8                    |
| 320 | $MgH_2 + 2 C \rightarrow MgC_2 + H_2$                                                            | 4.00  | 173.3                    |
| 321 | $2 MgH_2 + 3 C \rightarrow Mg_2C_3 + 2 H_2$                                                      | 4.55  | 93.2                     |
| 322 | $LiNH_2 + C \rightarrow LiCN + H_2$                                                              | 5.76  | 119.6                    |
| 323 | $LiBH_4 + C \rightarrow LiBC + 2 H_2$                                                            | 11.95 | 43.6(o)                  |

|     |                                                                                                                                     |      |                    |
|-----|-------------------------------------------------------------------------------------------------------------------------------------|------|--------------------|
|     |                                                                                                                                     |      | 35.3(h)            |
| 324 | $2 \text{LiNH}_2 + \text{C} \rightarrow \text{Li}_2\text{CN}_2 + 2 \text{H}_2$                                                      | 6.97 | 31.4               |
| 325 | $3 \text{ScH}_2 + \text{Al} + \text{C} \rightarrow \text{Sc}_3\text{AlC} + 3 \text{H}_2$                                            | 3.36 | 101.1              |
| 326 | $\text{ScH}_2 + 3 \text{Al} + 3 \text{C} \rightarrow \text{ScAl}_3\text{C}_3 + \text{H}_2$                                          | 1.23 | -68.5              |
| 327 | $\text{CaH}_2 + 2 \text{LiNH}_2 + \text{C} \rightarrow \text{CaCN}_2 + 2 \text{LiH} + 2 \text{H}_2$                                 | 4.03 | 24.6               |
| 328 | $\text{MgH}_2 + 2 \text{LiNH}_2 + \text{C} \rightarrow \text{MgCN}_2 + 2 \text{LiH} + 2 \text{H}_2$                                 | 4.79 | 126.5              |
| 329 | $\text{MgH}_2 + 2 \text{LiNH}_2 + \text{C} \rightarrow \text{Mg}(\text{NCN}) + 2 \text{LiH} + 2 \text{H}_2$                         | 4.79 | 23.8               |
| 330 | $\text{CaH}_2 + 2 \text{LiBH}_4 + 2 \text{C} \rightarrow \text{CaB}_2\text{C}_2 + 2 \text{LiH} + 4 \text{H}_2$                      | 7.35 | 59.7(o)<br>51.6(h) |
| 331 | $\text{ScH}_2 + 2 \text{LiBH}_4 + \text{C} \rightarrow \text{ScB}_2\text{C} + 2 \text{LiH} + 4 \text{H}_2$                          | 7.86 | 52.9(o)<br>44.8(h) |
| 332 | $\text{ScH}_2 + 2 \text{LiBH}_4 + 2 \text{C} \rightarrow \text{ScB}_2\text{C}_2 + 2 \text{LiH} + 4 \text{H}_2$                      | 7.04 | 52.4(o)<br>44.3(h) |
| 333 | $\text{MgH}_2 + 2 \text{LiBH}_4 + 2 \text{C} \rightarrow \text{MgB}_2\text{C}_2 + 2 \text{LiH} + 4 \text{H}_2$                      | 8.59 | 55.3(o)<br>47.2(h) |
| 334 | $\text{TiH}_2 + \text{C} \rightarrow \text{TiC} + \text{H}_2$                                                                       | 3.26 | -9.5               |
| 335 | $2 \text{TiH}_2 + \text{C} \rightarrow \text{Ti}_2\text{C} + 2 \text{H}_2$                                                          | 3.61 | 53.3               |
| 336 | $8 \text{TiH}_2 + 5 \text{C} \rightarrow \text{Ti}_8\text{C}_5 + 8 \text{H}_2$                                                      | 3.51 | 33.1               |
| 337 | $3 \text{TiH}_2 + \text{Si} + 2 \text{C} \rightarrow \text{Ti}_3\text{SiC}_2 + 3 \text{H}_2$                                        | 3.00 | -12.0              |
| 338 | $3 \text{TiH}_2 + \text{Al} + 2 \text{C} \rightarrow \text{Ti}_3\text{AlC}_2 + 3 \text{H}_2$                                        | 3.48 | -1.6               |
| 339 | $\text{TiH} + \text{C} \rightarrow \text{TiC} + 0.5 \text{H}_2$                                                                     | 1.66 | -164.6             |
| 340 | $2 \text{TiH} + \text{C} \rightarrow \text{Ti}_2\text{C} + \text{H}_2$                                                              | 1.84 | -39.1              |
| 341 | $8 \text{TiH} + 5 \text{C} \rightarrow \text{Ti}_8\text{C}_5 + 4 \text{H}_2$                                                        | 1.79 | -79.5              |
| 342 | $3 \text{TiH} + \text{Al} + \text{C} \rightarrow \text{Ti}_3\text{AlC} + 1.5 \text{H}_2$                                            | 1.63 | -45.4              |
| 343 | $3 \text{TiH} + \text{Si} + 2 \text{C} \rightarrow \text{Ti}_3\text{SiC}_2 + 1.5 \text{H}_2$                                        | 1.52 | -169.7             |
| 344 | $3 \text{TiH} + \text{Al} + 2 \text{C} \rightarrow \text{Ti}_3\text{AlC}_2 + 1.5 \text{H}_2$                                        | 1.53 | -148.9             |
| 345 | $\text{VH}_2 + \text{C} \rightarrow \text{VC} + \text{H}_2$                                                                         | 3.10 | -13.6              |
| 346 | $2 \text{VH}_2 + \text{C} \rightarrow \text{V}_2\text{C} + 2 \text{H}_2$                                                            | 3.42 | -1.9               |
| 347 | $6 \text{VH}_2 + 5 \text{C} \rightarrow \text{V}_6\text{C}_5 + 6 \text{H}_2$                                                        | 3.20 | -30.8              |
| 348 | $\text{V}_2\text{H} + \text{C} \rightarrow \text{V}_2\text{C} + 0.5 \text{H}_2$ (V <sub>2</sub> H – SG: I4 <sub>1</sub> /amd)       | 1.58 | -179.9             |
| 349 | $\text{V}_2\text{H} + 2 \text{C} \rightarrow 2 \text{VC} + 0.5 \text{H}_2$ (V <sub>2</sub> H – SG: I4 <sub>1</sub> /amd)            | 1.33 | -226.8             |
| 350 | $3 \text{V}_2\text{H} + 5 \text{C} \rightarrow \text{V}_6\text{C}_5 + 1.5 \text{H}_2$ (V <sub>2</sub> H – SG: I4 <sub>1</sub> /amd) | 1.40 | -295.5             |
| 351 | $\text{V}_2\text{H} + \text{C} \rightarrow \text{V}_2\text{C} + 0.5 \text{H}_2$ (V <sub>2</sub> H – SG: Cm)                         | 4.73 | -179.3             |
| 352 | $\text{V}_2\text{H} + 2 \text{C} \rightarrow 2 \text{VC} + 0.5 \text{H}_2$ (V <sub>2</sub> H – SG: Cm)                              | 1.33 | -226.2             |
| 353 | $3 \text{V}_2\text{H} + 5 \text{C} \rightarrow \text{V}_6\text{C}_5 + 1.5 \text{H}_2$ (V <sub>2</sub> H – SG: Cm)                   | 1.40 | -294.9             |

**Table S2:** Enthalpy of formation at 0 K for the compounds studied at the energy cutoff of 425 eV. For any compound  $A_xB_y$ , the enthalpy of formation is defined as  $\Delta H_f = E_{A_xB_y} - xE_A - yE_B$ , where  $E_{A_xB_y}$ ,  $E_A$  and  $E_B$  are the DFT calculated total energies of  $A_xB_y$ , **A** and **B** respectively.<sup>1</sup>

| Compound                                        | Space Group          | $\Delta H_f$ (kJ/mol) |
|-------------------------------------------------|----------------------|-----------------------|
| Al <sub>10</sub> V                              | Fd $\bar{3}m$        | -111.91               |
| Al <sub>12</sub> Mg <sub>17</sub>               | I $\bar{4}3m$        | -114.68               |
| Al <sub>2</sub> Ca                              | Fd $\bar{3}m$        | -100.88               |
| Al <sub>2</sub> Ca <sub>3</sub> Si <sub>2</sub> | Immm                 | -302.58               |
| Al <sub>2</sub> CaSi <sub>2</sub>               | P $\bar{3}m1$        | -157.98               |
| Al <sub>2</sub> Li <sub>3</sub>                 | R $\bar{3}m$         | -102.49               |
| Al <sub>2</sub> Sc                              | Fd $\bar{3}mS$       | -142.07               |
| Al <sub>2</sub> Ti                              | Cmmm                 | -124.14               |
| Al <sub>2</sub> Ti                              | I4 <sub>1</sub> /amd | -125.46               |
| Al <sub>3</sub> Li                              | Pm $\bar{3}m$        | -45.84                |
| Al <sub>3</sub> Sc                              | Pm $\bar{3}m$        | -180.34               |
| Al <sub>3</sub> Ti                              | I4/mmm               | -154.53               |
| Al <sub>3</sub> V                               | I4/mmm               | -110.26               |
| Al <sub>4</sub> Li <sub>9</sub>                 | C2/m                 | -223.06               |
| AlB <sub>2</sub>                                | P6/mmm               | -13.34                |
| AlH <sub>3</sub>                                | R $\bar{3}c$         | -16.62                |
| AlLi                                            | Fd $\bar{3}m$        | -40.27                |
| AlLi <sub>3</sub> N <sub>2</sub>                | Ia $\bar{3}$         | -530.27               |
| AlLiSi                                          | F $\bar{4}3m$        | -71.29                |
| AlMg <sub>4</sub> Si <sub>6</sub>               | C12/m1               | 110.69                |
| AlN                                             | P6 <sub>3</sub> mc   | -287.56               |
| AlSc                                            | Pm $\bar{3}m$        | -88.87                |
| AlSc <sub>2</sub>                               | P6 <sub>3</sub> /mmc | -103.91               |
| AlSc <sub>2</sub> Si <sub>2</sub>               | P4/mbm               | -342.00               |
| AlTi                                            | P4/mmm               | -79.41                |
| AlTi <sub>3</sub>                               | P6 <sub>3</sub> /mmc | -108.66               |
| AlV <sub>3</sub>                                | Pm $\bar{3}n$        | -50.23                |

<sup>1</sup> Corrections to a number of typographical errors in this table were made to this table in July 2007. We greatly appreciate Prof. C. Ahn and Prof. D. Jenkins, who pointed out these errors. All calculations reported in our paper were performed with the data listed in this corrected table; the incorrect information for some entries of this table that appeared previously was not used in any of the calculated results reported in our paper.

|                                                    |                      |         |
|----------------------------------------------------|----------------------|---------|
| Ca(AlH <sub>4</sub> ) <sub>2</sub>                 | Pbca                 | -212.11 |
| Ca <sub>2</sub> HN                                 | Fd $\bar{3}$ m       | -318.41 |
| Ca <sub>2</sub> LiSi <sub>3</sub>                  | Pnmm                 | -274.45 |
| Ca <sub>2</sub> N                                  | R $\bar{3}$ m        | -215.91 |
| Ca <sub>2</sub> N <sub>3</sub> V                   | C2/c                 | -718.74 |
| Ca <sub>3</sub> AlN <sub>3</sub>                   | P2 <sub>1</sub> /c   | -727.36 |
| Ca <sub>3</sub> BN <sub>3</sub>                    | P4/mmm               | -774.64 |
| Ca <sub>3</sub> N <sub>2</sub>                     | Ia $\bar{3}$         | -405.47 |
| Ca <sub>3</sub> N <sub>3</sub> V                   | Cmcm                 | -754.56 |
| Ca <sub>5</sub> Si <sub>3</sub>                    | I4/mcm               | -352.76 |
| CaB <sub>2</sub> C <sub>2</sub>                    | P $\bar{4}$ 2c       | -107.42 |
| CaB <sub>2</sub> C <sub>2</sub>                    | I4/mcm               | -180.77 |
| CaB <sub>6</sub>                                   | Pm $\bar{3}$ m       | -291.60 |
| CaCN <sub>2</sub>                                  | R $\bar{3}$ mR       | -366.90 |
| CaH <sub>2</sub>                                   | Pnma                 | -173.15 |
| CaLi <sub>2</sub>                                  | P6 <sub>3</sub> /mmc | -5.97   |
| CaLiN                                              | Pnma                 | -203.65 |
| CaLiSi <sub>2</sub>                                | Pnma                 | -163.46 |
| CaMgSi                                             | Pnma                 | -134.22 |
| CaMg <sub>2</sub>                                  | P6 <sub>3</sub> /mmc | -38.00  |
| CaMg <sub>2</sub> N <sub>2</sub>                   | P $\bar{3}$ m1       | -428.51 |
| CaSi                                               | Cmcm                 | -99.05  |
| CaSi <sub>2</sub>                                  | R $\bar{3}$ m H      | -113.42 |
| Li <sub>12</sub> Mg <sub>3</sub> Si <sub>4</sub>   | I $\bar{4}$ 3d       | -455.05 |
| Li <sub>2</sub> CN <sub>2</sub>                    | I4/mmm               | -350.73 |
| Li <sub>2</sub> Si                                 | C2/m                 | -250.11 |
| Li <sub>3</sub> AlH <sub>6</sub>                   | R $\bar{3}$ H        | -298.94 |
| Li <sub>3</sub> BN <sub>2</sub>                    | P4 <sub>2</sub> /mnm | -520.85 |
| Li <sub>3</sub> N                                  | P6 <sub>3</sub> /mmc | -158.51 |
| Li <sub>3</sub> ScN <sub>2</sub>                   | Ia $\bar{3}$         | -576.78 |
| Li <sub>4</sub> BNH <sub>10</sub>                  | I2 <sub>1</sub> 3    | -833.26 |
| Li <sub>4</sub> NH                                 | I4 <sub>1</sub> /a   | -250.67 |
| Li <sub>5</sub> N <sub>3</sub> Si<br>(10 Si atoms) | Ia $\bar{3}$         | -677.74 |
| Li <sub>5</sub> N <sub>3</sub> Si<br>(11 Si atoms) | Ia $\bar{3}$         | -688.11 |
| Li <sub>7</sub> N <sub>4</sub> V                   | P $\bar{4}$ 3a       | -964.21 |
| Li <sub>7</sub> N <sub>4</sub> V                   | Pa $\bar{3}$         | -967.44 |

|                                                        |                      |         |
|--------------------------------------------------------|----------------------|---------|
| Li <sub>7</sub> N <sub>4</sub> V                       | P4 <sub>2</sub> /nmc | -959.56 |
| Li <sub>7</sub> Si <sub>2</sub>                        | Pbam                 | -198.63 |
| LiAlH <sub>4</sub>                                     | P2/c                 | -104.73 |
| LiBC                                                   | P6 <sub>3</sub> /mmc | -118.40 |
| LiBH <sub>4</sub>                                      | Pnma                 | -208.87 |
| LiBH <sub>4</sub>                                      | P6 <sub>3</sub> mc   | -192.36 |
| LiCN                                                   | Pnma                 | -87.15  |
| LiH                                                    | Fm $\bar{3}$ m       | -85.29  |
| LiMgN                                                  | Pnma                 | -207.46 |
| LiN <sub>3</sub>                                       | C2/m                 | -62.70  |
| LiNH <sub>2</sub>                                      | I $\bar{4}$          | -206.77 |
| LiSi                                                   | I4 <sub>1</sub> /a   | -40.26  |
| Mg(NCN)                                                | R $\bar{3}$ mH       | -260.02 |
| Mg <sub>2</sub> C <sub>3</sub>                         | Pnmm                 | 56.95   |
| Mg <sub>2</sub> Si                                     | Fm $\bar{3}$ m       | -54.25  |
| Mg <sub>3</sub> BN <sub>3</sub>                        | P6 <sub>3</sub> /mmc | -647.14 |
| Mg <sub>3</sub> N <sub>2</sub>                         | Ia $\bar{3}$         | -409.28 |
| MgB <sub>2</sub>                                       | P6/mmm               | -46.49  |
| MgB <sub>2</sub> C <sub>2</sub>                        | Cmca                 | -981.26 |
| MgB <sub>4</sub>                                       | Pnma                 | -75.79  |
| MgB <sub>7</sub><br>(Mg <sub>8</sub> B <sub>56</sub> ) | Imma                 | -109.28 |
| MgB <sub>7</sub><br>(Mg <sub>7</sub> B <sub>56</sub> ) | Imma                 | -93.59  |
| MgB <sub>9</sub> N                                     | R $\bar{3}$ mH       | -433.08 |
| MgC <sub>2</sub>                                       | P4 <sub>2</sub> /mnm | 108.56  |
| MgCN <sub>2</sub>                                      | I $\bar{4}$ 2d       | -54.58  |
| MgH <sub>2</sub>                                       | P4 <sub>2</sub> /mnm | -64.68  |
| MgSiN <sub>2</sub>                                     | Pna2 <sub>1</sub>    | -479.67 |
| N(SiH <sub>3</sub> ) <sub>3</sub>                      | P $\bar{1}$          | -176.35 |
| N <sub>4</sub> Si <sub>3</sub> - $\alpha$              | P31c                 | -768.20 |
| N <sub>4</sub> Si <sub>3</sub> - $\beta$               | P6 <sub>3</sub> /m   | -768.89 |
| Na <sub>3</sub> AlH <sub>6</sub>                       | P2 <sub>1</sub> /n   | -208.16 |
| NaAlH <sub>4</sub>                                     | I4 <sub>1</sub> /a   | -101.25 |
| NaH                                                    | Fm $\bar{3}$ m       | -43.99  |
| NaMgH <sub>3</sub>                                     | Pnma                 | -119.33 |
| NaSi                                                   | C2/c                 | -5.88   |
| Sc <sub>2</sub> BC <sub>2</sub>                        | I4/mmm               | -295.61 |



|                                                |                                  |          |
|------------------------------------------------|----------------------------------|----------|
| Sc <sub>2</sub> C                              | P $\bar{3}$ m1                   | -131.04  |
| Sc <sub>2</sub> C <sub>3</sub>                 | I $\bar{4}$ 3d                   | -152.64  |
| Sc <sub>2</sub> V <sub>3</sub> Si <sub>4</sub> | P4 <sub>1</sub> 2 <sub>1</sub> 2 | -628.51  |
| Sc <sub>3</sub> AlC                            | Pm $\bar{3}$ m                   | -296.68  |
| Sc <sub>3</sub> C <sub>4</sub>                 | P4/mnc                           | -302.81  |
| Sc <sub>4</sub> C <sub>3</sub>                 | I $\bar{4}$ 3d                   | -360.84  |
| Sc <sub>5</sub> Si <sub>3</sub>                | P6 <sub>3</sub> /mcm             | -590.07  |
| ScAl <sub>3</sub> C <sub>3</sub>               | P6 <sub>3</sub> mc               | -268.46  |
| ScB <sub>12</sub>                              | Fm $\bar{3}$ m                   | -272.43  |
| ScB <sub>2</sub>                               | P6/mmm                           | -247.86  |
| ScB <sub>2</sub> C                             | P4 <sub>2</sub> /mbc             | -234.95  |
| ScB <sub>2</sub> C <sub>2</sub>                | Pbam                             | -237.08  |
| ScC                                            | Fm $\bar{3}$ m                   | -36.37   |
| ScH <sub>2</sub>                               | Fm $\bar{3}$ m                   | -199.94  |
| ScN                                            | Fm $\bar{3}$ m                   | -387.02  |
| ScSi                                           | Cmcm                             | -160.17  |
| ScSi <sub>2</sub>                              | P6/mmm                           | -32.01   |
| SiB <sub>6</sub>                               | Pm3m                             | 301.99   |
| Ti <sub>2</sub> AlN                            | P6 <sub>3</sub> /mmc             | -455.00  |
| Ti <sub>2</sub> C                              | Fd $\bar{3}$ m                   | -178.77  |
| Ti <sub>2</sub> N                              | I4 <sub>1</sub> /amd             | -377.59  |
| Ti <sub>2</sub> N                              | P4 <sub>2</sub> /mnm             | -383.91  |
| Ti <sub>3</sub> AlC                            | Pm $\bar{3}$ m                   | -277.57  |
| Ti <sub>3</sub> AlC <sub>2</sub>               | P6 <sub>3</sub> /mmc             | -432.87  |
| Ti <sub>3</sub> AlN                            | Pm $\bar{3}$ m                   | -458.30  |
| Ti <sub>3</sub> SiC <sub>2</sub>               | P6 <sub>3</sub> /mmc             | -463.99  |
| Ti <sub>4</sub> AlN <sub>3</sub>               | P6 <sub>3</sub> /mmc             | -1142.13 |
| Ti <sub>5</sub> Si <sub>3</sub>                | P6 <sub>3</sub> /mcm             | -571.51  |
| Ti <sub>5</sub> Si <sub>4</sub>                | P4 <sub>1</sub> 2 <sub>1</sub> 2 | -660.34  |
| Ti <sub>8</sub> C <sub>5</sub>                 | R $\bar{3}$ mH                   | -876.74  |
| TiB                                            | F $\bar{4}$ 3m                   | 139.10   |
| TiB                                            | Pnma                             | -156.74  |
| TiB <sub>2</sub>                               | P6/mmm                           | -300.58  |
| TiC                                            | Fm $\bar{3}$ m                   | -152.14  |
| TiH                                            | P4 <sub>2</sub> /n               | -69.84   |
| TiH <sub>2</sub>                               | Fm $\bar{3}$ m                   | -142.66  |
| TiN                                            | Fm $\bar{3}$ m                   | -333.64  |

Electronic Supplementary Material for PCCP  
This journal is © The Owner Societies 2007

|                                |                      |          |
|--------------------------------|----------------------|----------|
| TiSi                           | Pnma                 | -142.71  |
| TiSi <sub>2</sub>              | Fddd                 | -148.82  |
| V <sub>2</sub> B <sub>3</sub>  | Cmcm                 | -373.13  |
| V <sub>2</sub> C               | Pbcn                 | -274.62  |
| V <sub>2</sub> H               | I4 <sub>1</sub> /amd | -40.47   |
| V <sub>2</sub> H               | Cm                   | -40.77   |
| V <sub>3</sub> B <sub>2</sub>  | P4/mbm               | -338.66  |
| V <sub>3</sub> Si              | Pm $\bar{3}$ n       | -174.20  |
| V <sub>6</sub> C <sub>5</sub>  | P3 <sub>1</sub> 12   | -1285.57 |
| V <sub>6</sub> Si <sub>5</sub> | Ibam                 | -531.53  |
| VB                             | Cmcm                 | -157.69  |
| VB <sub>2</sub>                | P6/mmm               | -207.95  |
| VC                             | Fm $\bar{3}$ m       | -221.13  |
| VH <sub>2</sub>                | Fm $\bar{3}$ m       | -63.31   |
| VN                             | Fm $\bar{3}$ m       | -192.88  |
| VSi <sub>2</sub>               | P6 <sub>4</sub> 22   | -124.23  |
